# Supplementary material for: Chiral 3D DNA origami structures for ordered heterologous arrays
Source: Royal Society of Chemistry journal article supplement (doi:10.1039/d1na00385b), 2021-01-01
Supplement: d1na00385b1.pdf [file d1na00385b1.pdf]

## **Chiral 3D DNA Origami Structures for Ordered Heterologous Arrays**

Md. Sirajul Islam<sup>1</sup>, Gerrit D. Wilkens<sup>1,2</sup>, Karol Wolski<sup>3</sup>, Szczepan  
Zapotoczny<sup>3</sup>, Jonathan G. Heddle<sup>1\*</sup>

1 Malopolska Centre of Biotechnology, Jagiellonian University,  
Gronostajowa 7A, Kraków 30-387, Poland

2 School of Molecular Medicine, Medical University of  
Warsaw, Warszawa 02-091, Poland

3 Faculty of Chemistry, Jagiellonian University, Gronostajowa 2,  
Kraków 30-387, Poland

\* Corresponding author email: [jonathan.heddle@uj.edu.pl](mailto:jonathan.heddle@uj.edu.pl)

## INDEX

|                                                                                                |    |
|------------------------------------------------------------------------------------------------|----|
| Production of custom scaffold DNA .....                                                        | 3  |
| Structure assembly and purification .....                                                      | 3  |
| Figure S1: Sn origami synthesis and characterization.....                                      | 3  |
| Post-design modifications for Snubcube dimer and chain formation.....                          | 3  |
| Figure S2: Post-design modification for staple strands of the SnL and SnR.....                 | 4  |
| Assembly of DNA Snubcube Dimers.....                                                           | 9  |
| Figure S3: AFM images of SnL-SnL dimer structures assembled at 10 nM conc. and 25 °C. ....     | 10 |
| Figure S4: AFM images of SnL-SnL dimer structures assembled at 10 nM conc. and 37 °C. ....     | 11 |
| Figure S5: AFM images of SnL-SnL dimer structures assembled at 10 nM conc. and 45 °C. ....     | 12 |
| Figure S6: AFM images of SnL-SnL dimer structures assembled at 20 nM conc. and 25 °C. ....     | 13 |
| Figure S7: AFM images of SnL-SnL dimer structures assembled at 20 nM conc. and 37 °C. ....     | 14 |
| Figure S8: AFM images of SnL-SnL dimer structures at 20 nM conc. and 45 °C.....                | 14 |
| Figure S9: AFM images of SnL-SnL dimer structures assembled at 30 nM conc. and 25 °C. ....     | 15 |
| Figure S10: AFM images of SnL-SnL dimer structures assembled at 30 nM conc. and 37 °C. ...     | 16 |
| Figure S11: AFM images of SnL-SnL dimer structures assembled at 30 nM conc. and 45 °C. ...     | 17 |
| Figure S12: AFM images of SnL-SnR dimer structures assembled at 10 nM conc. and 45 °C. ...     | 18 |
| Figure S13 : AFM images of SnR-SnR dimer structures assembled at 10 nM conc. and 45 °C. ...    | 19 |
| Table S1: Observed products in SnL-SnL hybridisation.....                                      | 20 |
| Table S2: Observed products in SnL-SnR and SnR-SnR hybridisation.....                          | 20 |
| Assembly of Snubcube Chain structures.....                                                     | 21 |
| Figure S14 : AFM images of 1D chain structure.....                                             | 21 |
| Streptavidin labelling of Sn Dimer and Chain structures .....                                  | 22 |
| Figure S15: AFM images of SA bound SnL-SnL dimer structures. ....                              | 22 |
| Figure S16: AFM images of SA bound SnL-SnR dimer structures. ....                              | 23 |
| Figure S17: AFM images of SA bound SnR-SnR dimer structures. ....                              | 24 |
| Table S3: Observed attachment of streptavidin to Snubcube dimers.....                          | 25 |
| Figure 18: AFM images of SA bound to 1D chain structure.....                                   | 26 |
| Scaffold and unmodified Staple Sequences of SnL and SnR.....                                   | 27 |
| Table S4: Sequences of the custom scaffold. ....                                               | 27 |
| Table S5: Sequences of the staple strands for SnL without modification .....                   | 28 |
| Table S6: Sequences of the staple strands for SnR without any modification. ....               | 30 |
| Modified Staple Sequences of SnL and SnR.....                                                  | 32 |
| Table S7: Sequences of the modified staple strands for SnL for dimer and 1D chain structure. . | 32 |
| Table S8: Sequences of the modified staple strands for SnL for 2D structure formation. ....    | 33 |
| Table S9: Sequences of the modified staple strands for SnR for dimer and 1D chain structure. . | 35 |
| Table S10: Sequences of the modified staple strands for SnR for 2D structure formation. ....   | 36 |

## Structure assembly and purification

DNA Snub-cube (Sn) structures were computed using the DAEDALUS package. All staple stands were purchased from Integrated DNA Technologies with normalised concentrations to 200  $\mu\text{M}$  in milliQ water. Monomeric DNA Sns were assembled from a pool of staple strands and the scaffold at 60 nM and 12.5 nM concentration respectively in 1 x TE/ $\text{Mg}^{2+}$  buffer (5 mM Tris, 1 mM EDTA and 12.5 mM  $\text{MgCl}_2$ , pH 8.0). The annealing was performed in a PCR thermal cycler as follows: 95  $^\circ\text{C}$  for 5 min, 80  $^\circ\text{C}$  to 75  $^\circ\text{C}$  at a rate of -1  $^\circ\text{C}$  per 5 min, 75  $^\circ\text{C}$  to 30  $^\circ\text{C}$  at a rate of -1 $^\circ\text{C}$  per 15 min and 30  $^\circ\text{C}$  to 25  $^\circ\text{C}$  at a rate of -1  $^\circ\text{C}$  per 10 min. -1  $^\circ\text{C}$  per 5 min, 75  $^\circ\text{C}$  to 30  $^\circ\text{C}$  at a rate of -1 $^\circ\text{C}$  per 15 min and 30  $^\circ\text{C}$  to 25  $^\circ\text{C}$  at a rate of -1  $^\circ\text{C}$  per 10 min.

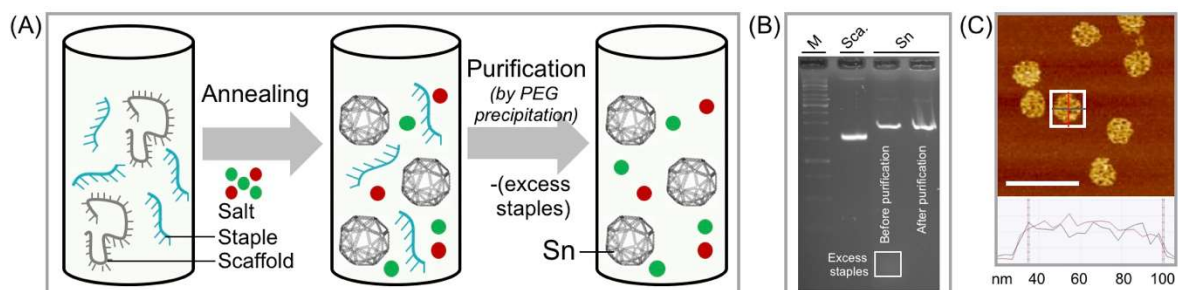

**Figure S1:** Sn origami synthesis and characterization. (A) synthesis of origami structure annealed by mixing scaffold and excess staple strands in the presence of  $\text{MgCl}_2$  followed by PEG precipitation to remove excess staple strands, (B) agarose gel image of the origami structure before and after purification and (C) AFM image of the assembled Sn DNA origami structure. AFM scale bar represents 200 nm.

To purify assembled DNA origami structures from excess staple strands, folded structures were mixed with PEG buffer (5 mM Tris, pH 8.0, 15% PEG-8000, 500 mM NaCl, 20 mM  $\text{MgCl}_2$ ) at a ratio of 1:2 and incubated overnight. Then, the mixture was centrifuged at 10000 rpm for 10 min at room temperature. The supernatant was removed, and the pellet was dissolved in 20  $\mu\text{l}$  1x TAE/Mg buffer.

## Post-design modifications for $S_n$ dimer and chain formation

To modify the  $S_n$  structures, the 3D structural model in the PDB file format computed by DAEDALUS was used to identify appropriate staple strands at the corners of each square of the  $S_n$  structure which were extended with strand extensions to form dimeric or chain structures (Fig. S2). A list of the original and modified staple sequences can be found in table S5 – S10.

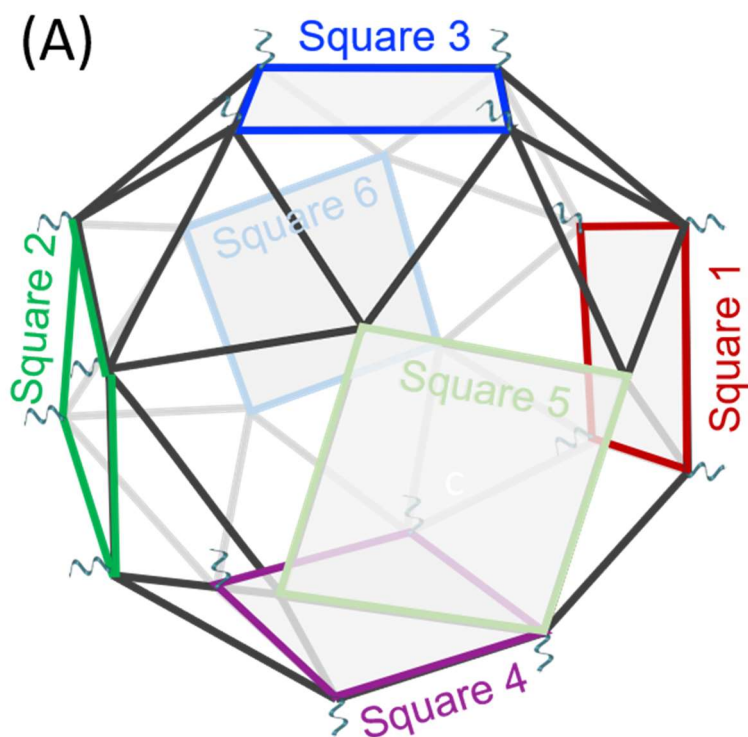

(B) Square 1 of SnL

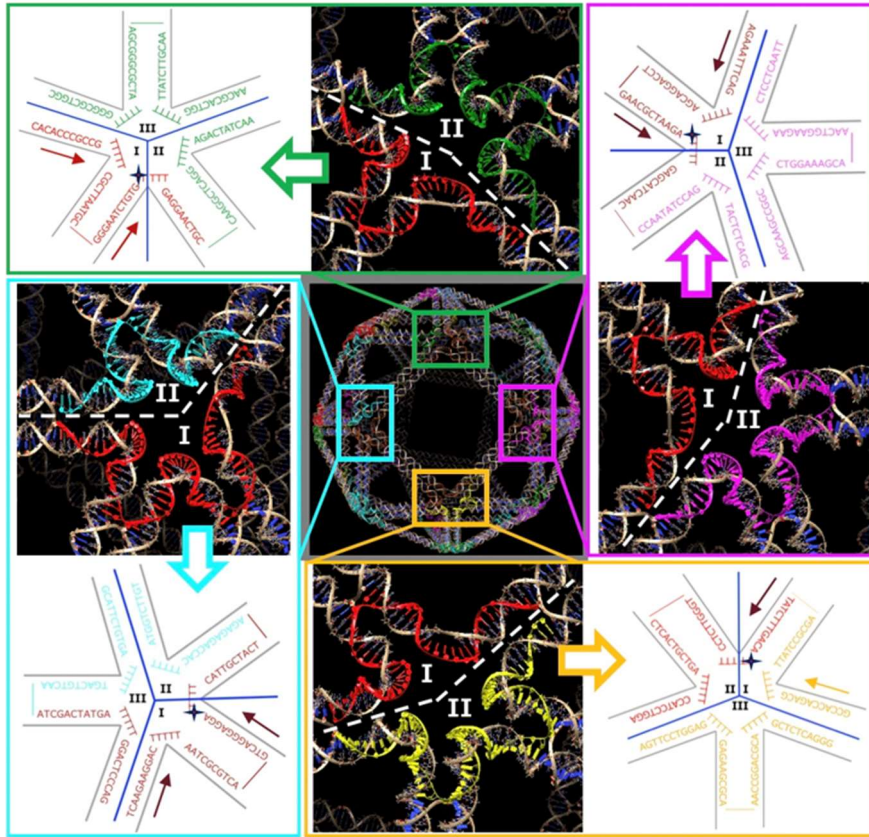

(C) Square 2 of SnL

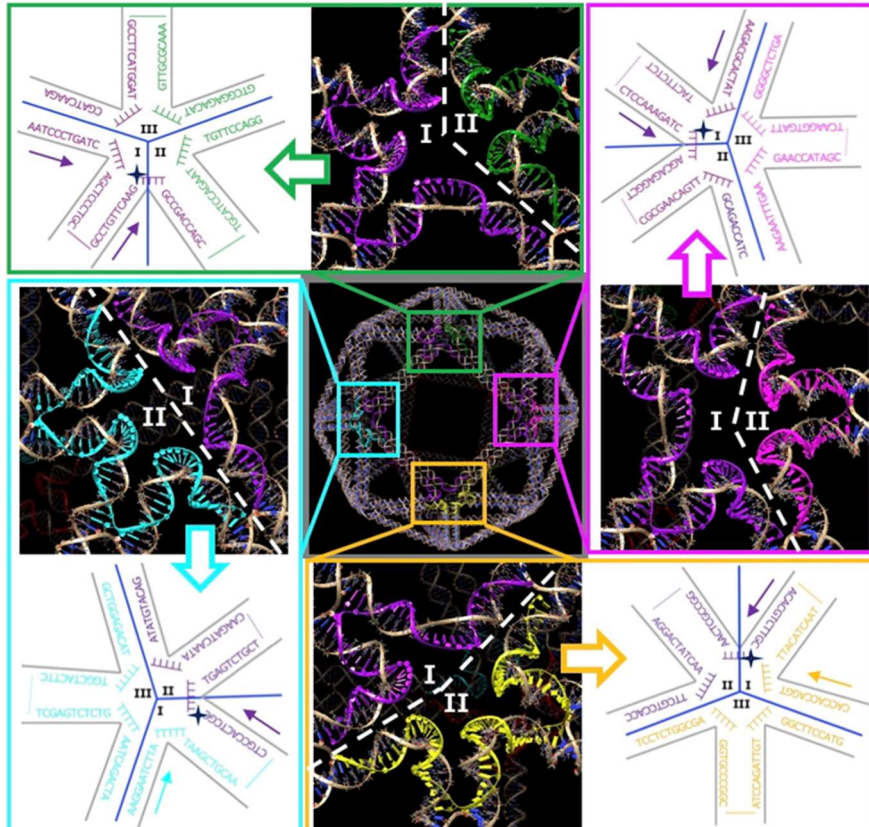

(D) Square 3 of SnL

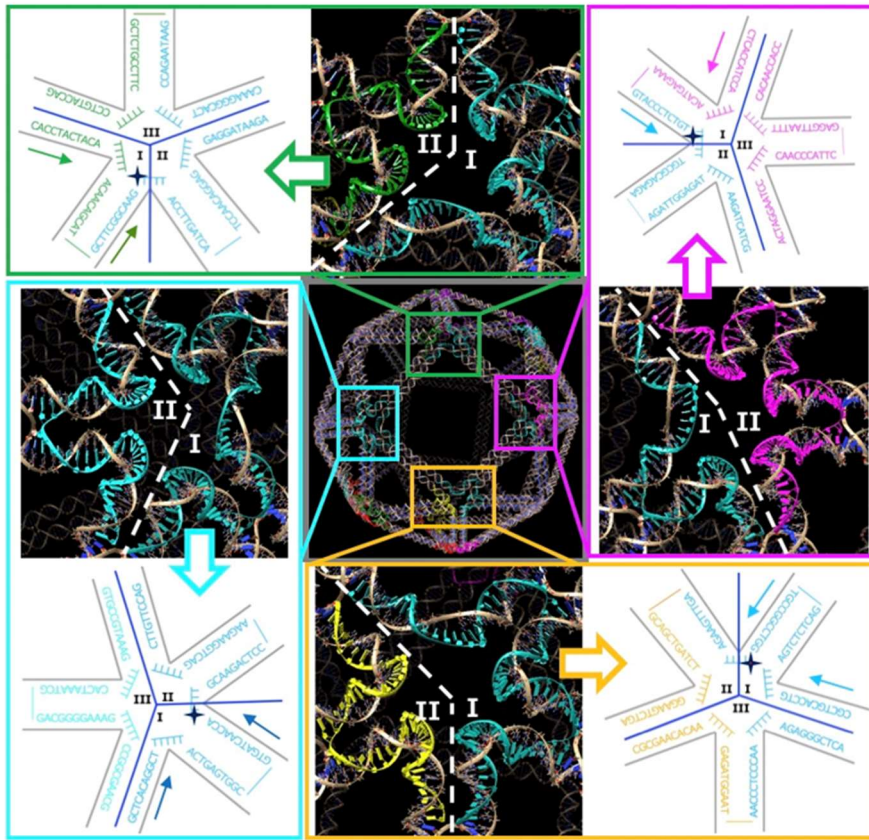

(E) Square 4 of SnL

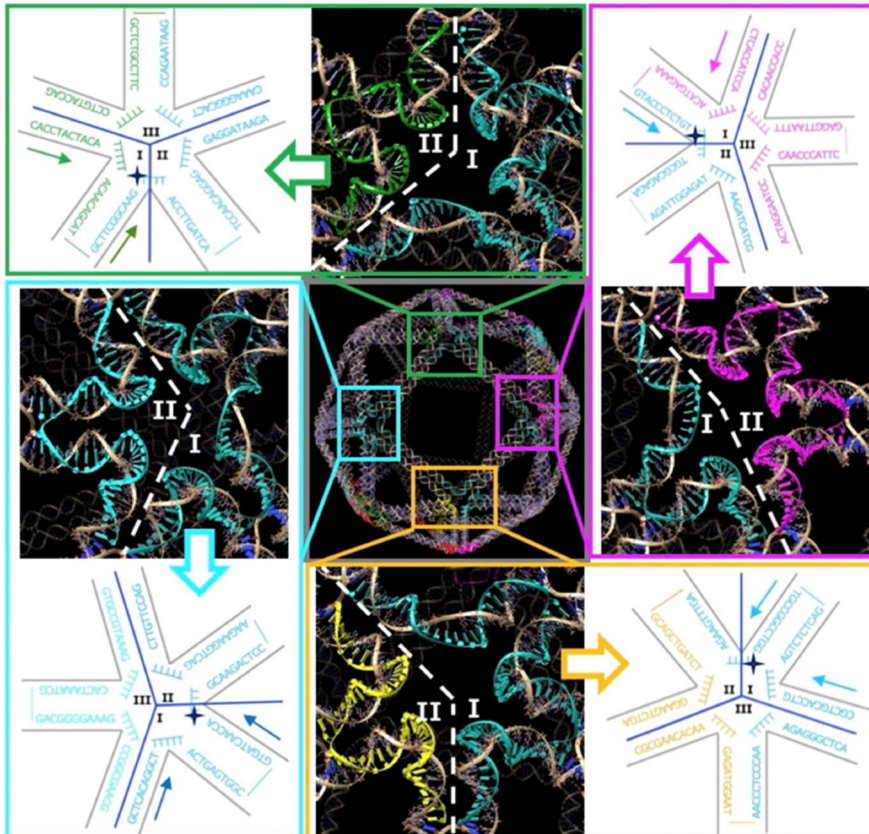

(F) Square 1 of SnR

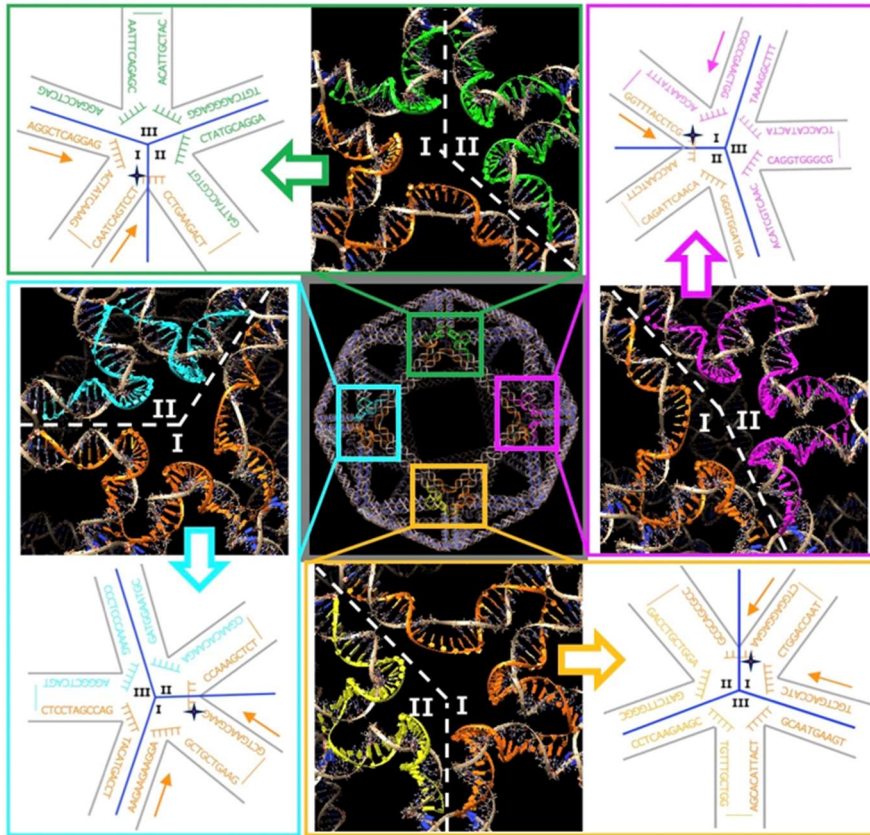

(G) Square 2 of SnR

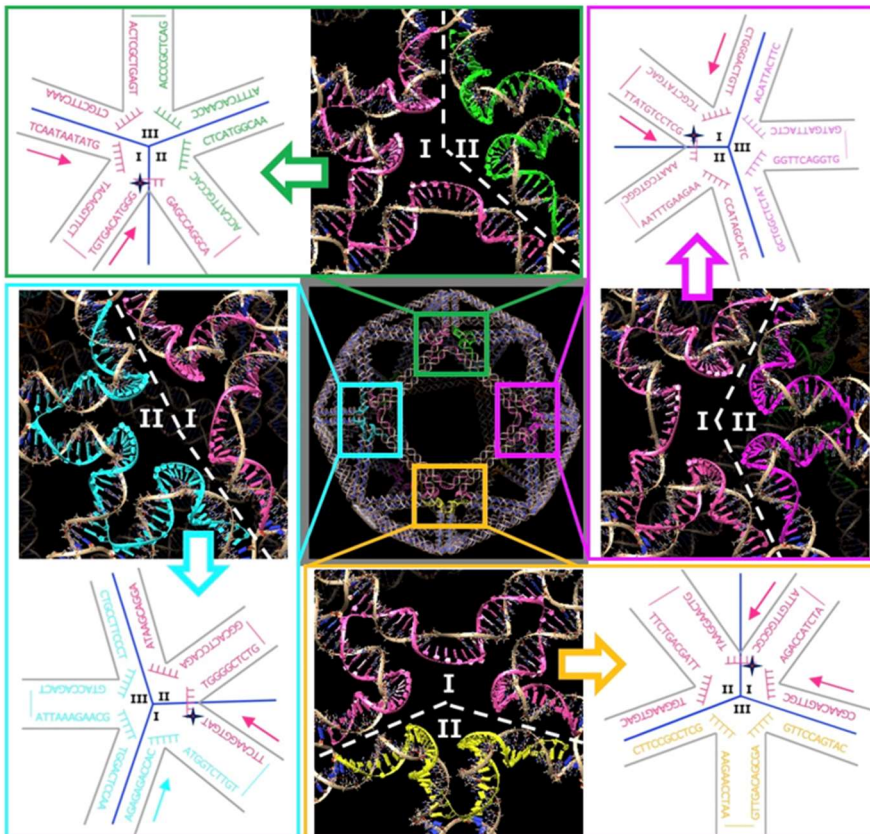





**Figure S2:** Post-design modification for staple strands of the SnL and SnR. (A) 3D model of Sn structure, where squares are labelled as 1-6, details of the staple strand modification scheme for SnL of (B) square 1, (C) square 2, (D) square 3, (E) square 4 and for SnR of (F) square 1, (G) square 2, (H) square 3, (I) square 4.

### Assembly of DNA Sn Dimers and Chains

To initially test structure hybridisation, SnL-SnL SnR-SnR and SnL-SnR dimers with complimentary staple extensions were mixed at a final concentration of 10 nM, 20 nM and 30 nM for each monomeric structure, incubated over night at 25 °C, 37 °C or 45 °C and analysed via agarose gel electrophoresis. AFM images were taken for structures assembled at 45 °C and 10 nM concentration. All other assemblies (chains and 2D lattice) were at 10 nM concentration for each monomer and incubated overnight at 45 °C.

To selectively label Sn dimer and chain structures with streptavidin, a staple strand at the corner of square 5 of SnL (5'-CGA AGC ACT CAT TTT TGG GAA CTG GAG TTA TCC CTA TTT TTT CCT GAA GTA C) was modified with BiotinTEG at its 3' end.

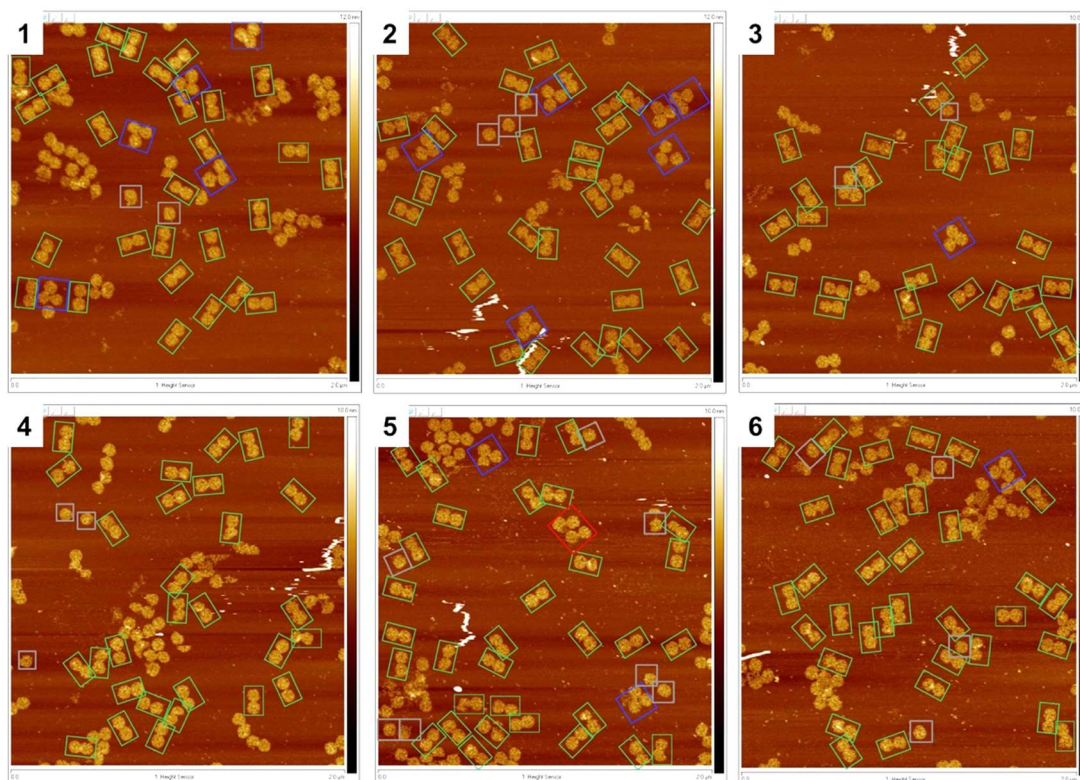

**Figure S3:** AFM images of SnL-SnL dimer structures assembled from 10 nM Sn and incubated at 25 °C overnight for Figure 2B. Structures in single, dimer, trimer and tetramers are indicated with grey, green, blue and red boxes respectively. Structures higher than tetramers are considered as aggregates. Counted numbers of the structures are shown in Supplementary Table S8. All images are 2  $\mu\text{m}$   $\times$  2  $\mu\text{m}$ .

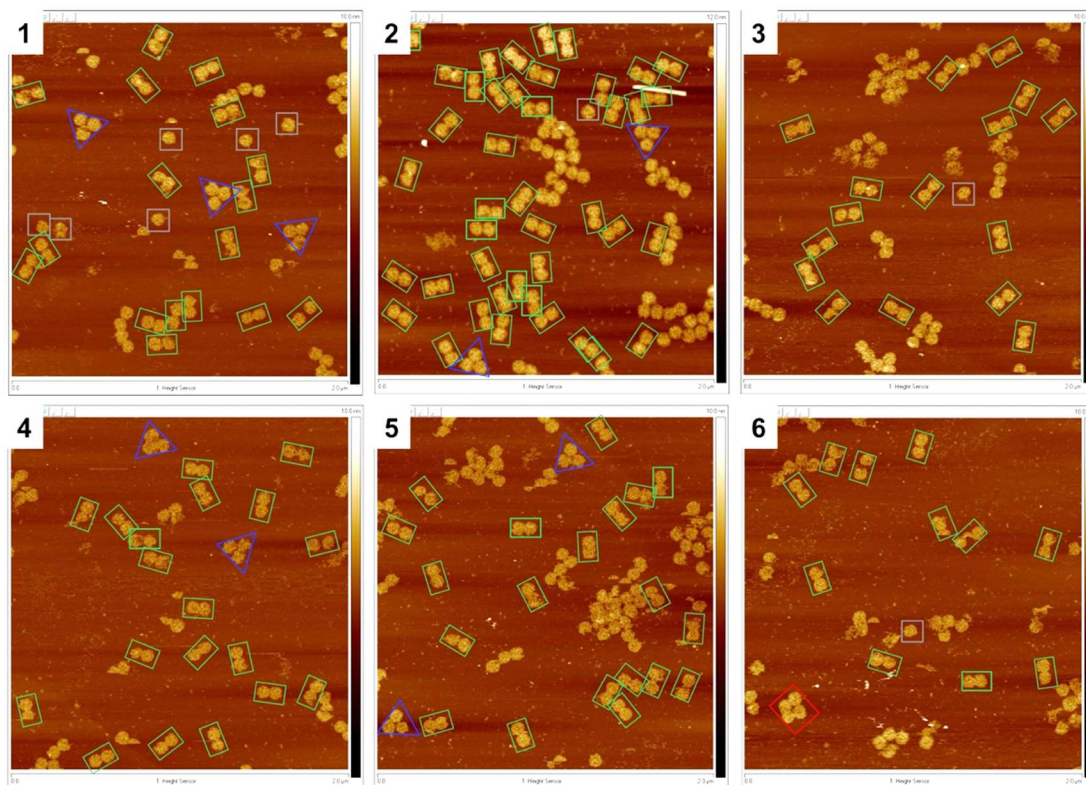

**Figure S4:** AFM images of SnL-SnL dimer structures assembled from 10 nM Sn and incubated at 37 °C overnight for Figure 2B. Structures in single, dimer, trimer and tetramers are indicated with grey, green, blue and red boxes respectively. Structures higher than tetramers are considered as aggregates. Counted numbers of the structures are shown in Supplementary Table S8. All images are 2  $\mu\text{m}$   $\times$  2  $\mu\text{m}$ .

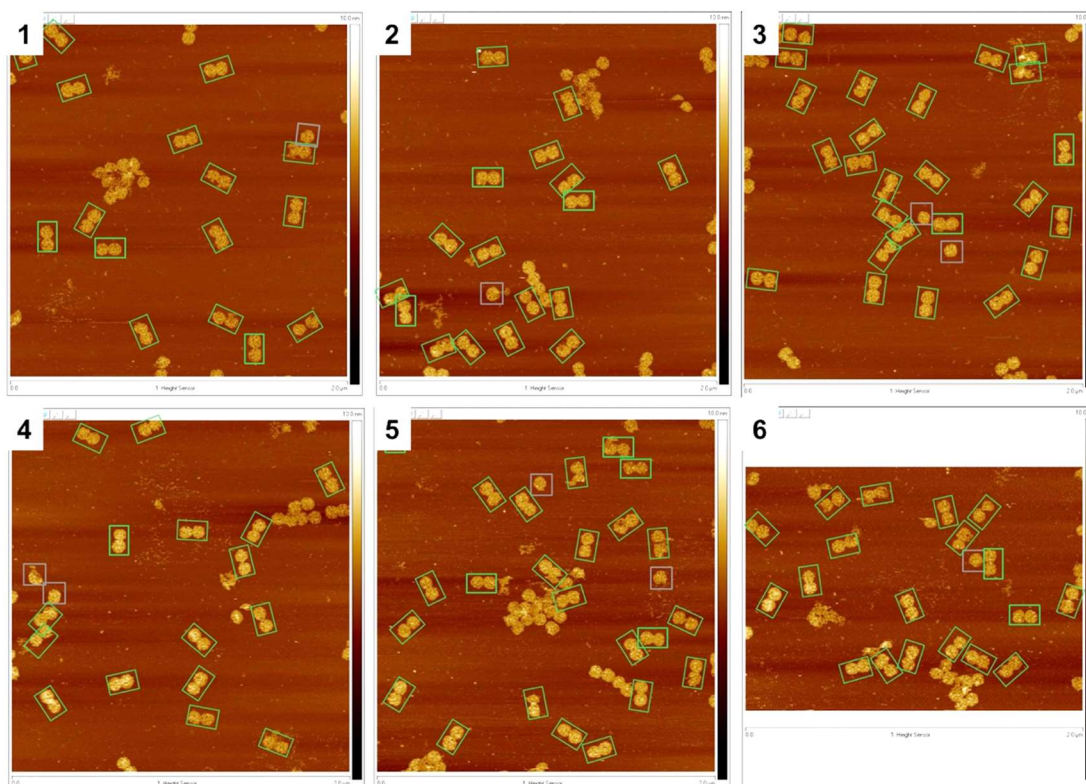

**Figure S5:** AFM images of SnL-SnL dimer structures assembled from 10 nM Sn and incubated at 45 °C overnight for Figure 2B. Structures in single, dimer, trimer and tetramers are indicated with grey, green, blue and red boxes respectively. Structures higher than tetramers are considered as aggregates. Counted numbers of the structures are shown in Supplementary Table S8. All images are 2  $\mu\text{m}$   $\times$  2  $\mu\text{m}$ .

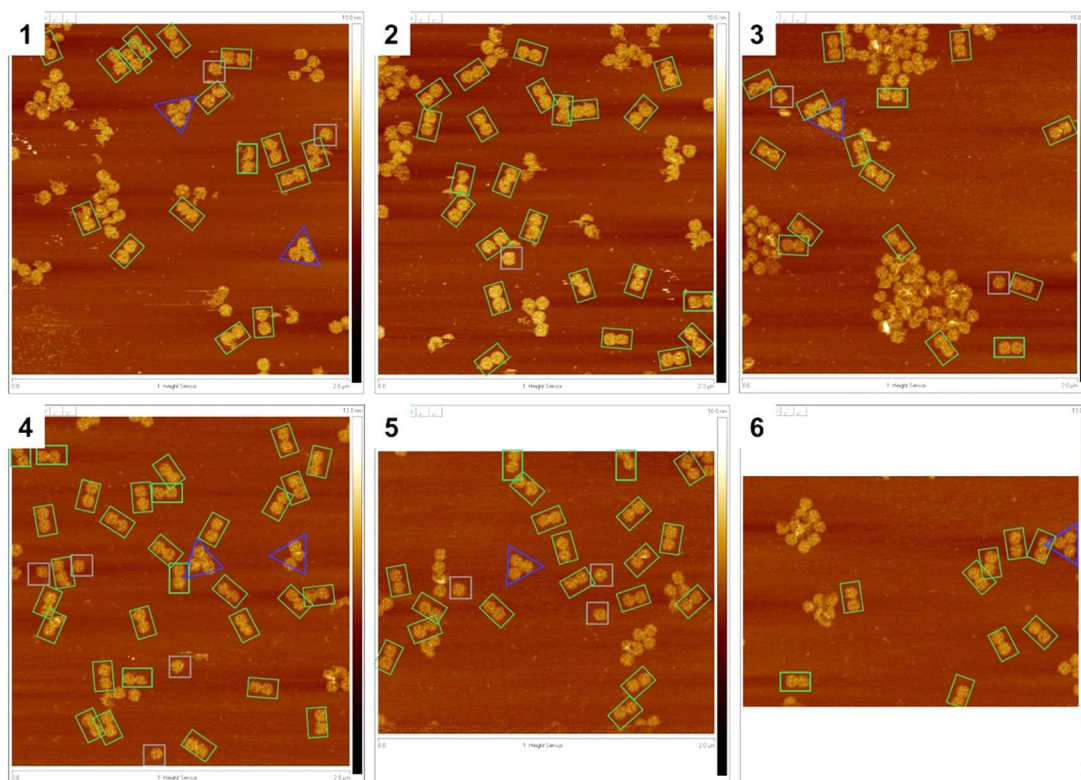

**Figure S6:** AFM images of SnL-SnL dimer structures assembled from 20 nM Sn and incubated at 25 °C overnight for Figure 2B. Structures in single, dimer, trimer and tetramers are indicated with grey, green, blue and red boxes respectively. Structures higher than tetramers are considered as aggregates. Counted numbers of the structures are shown in Supplementary Table S8. All images are 2  $\mu\text{m}$   $\times$  2  $\mu\text{m}$ .

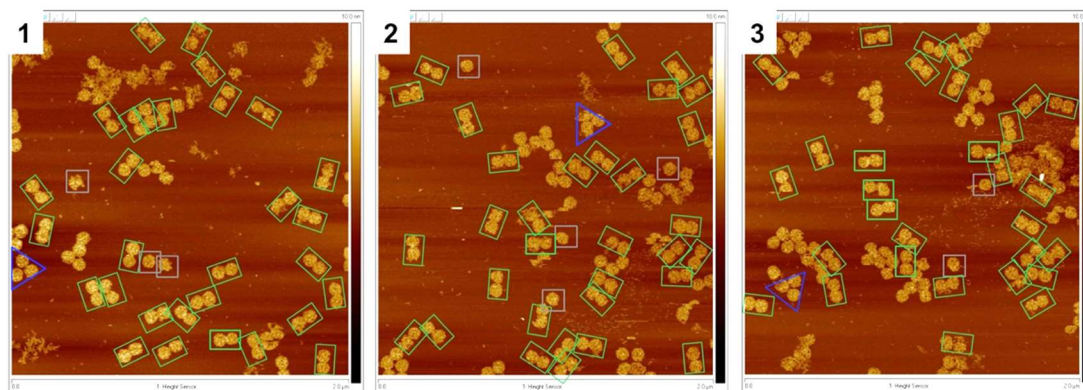

**Figure S7:** AFM images of SnL-SnL dimer structures assembled from 20 nM Sn and incubated at 37 °C overnight for Figure 2B. Structures in single, dimer, trimer and tetramers are indicated with grey, green, blue and red boxes respectively. Structures higher than tetramers are considered as aggregates. Counted numbers of the structures are shown in Supplementary Table S8. All images are 2  $\mu\text{m}$   $\times$  2  $\mu\text{m}$ .

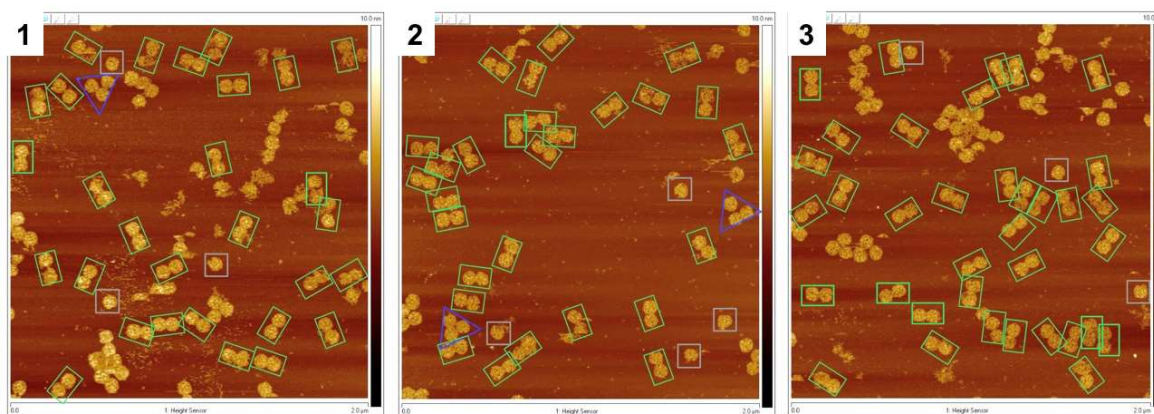

**Figure S8:** AFM images of SnL-SnL dimer structures assembled from 20 nM Sn and incubated at 45 °C overnight for Figure 2B. Structures in single, dimer, trimer and tetramers are indicated with grey, green, blue and red boxes respectively. Structures higher than tetramers are considered as aggregates. Counted numbers of the structures are shown in Supplementary Table S8. All images are 2  $\mu\text{m}$   $\times$  2  $\mu\text{m}$ .

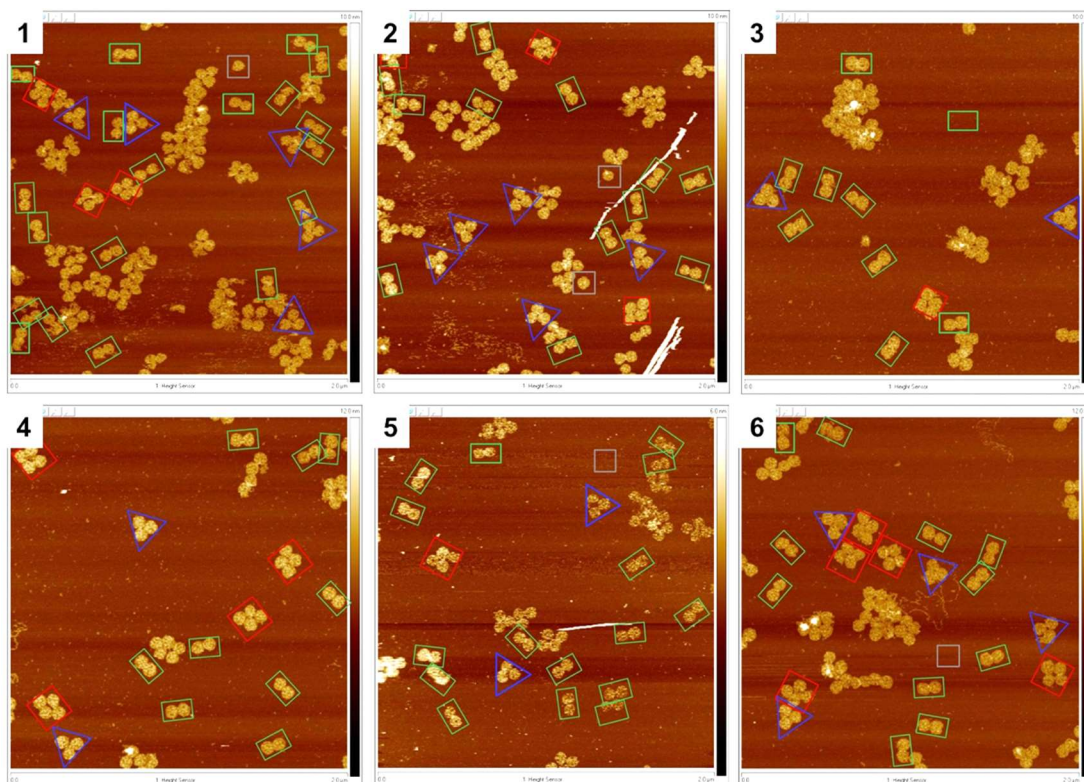

**Figure S9:** AFM images of SnL-SnL dimer structures assembled from 30 nM Sn and incubated at 25 °C overnight for Figure 2B. Structures in single, dimer, trimer and tetramers are indicated with grey, green, blue and red boxes respectively. Structures higher than tetramers are considered as aggregates. Counted numbers of the structures are shown in Supplementary Table S8. All images are 2  $\mu\text{m}$   $\times$  2  $\mu\text{m}$ .

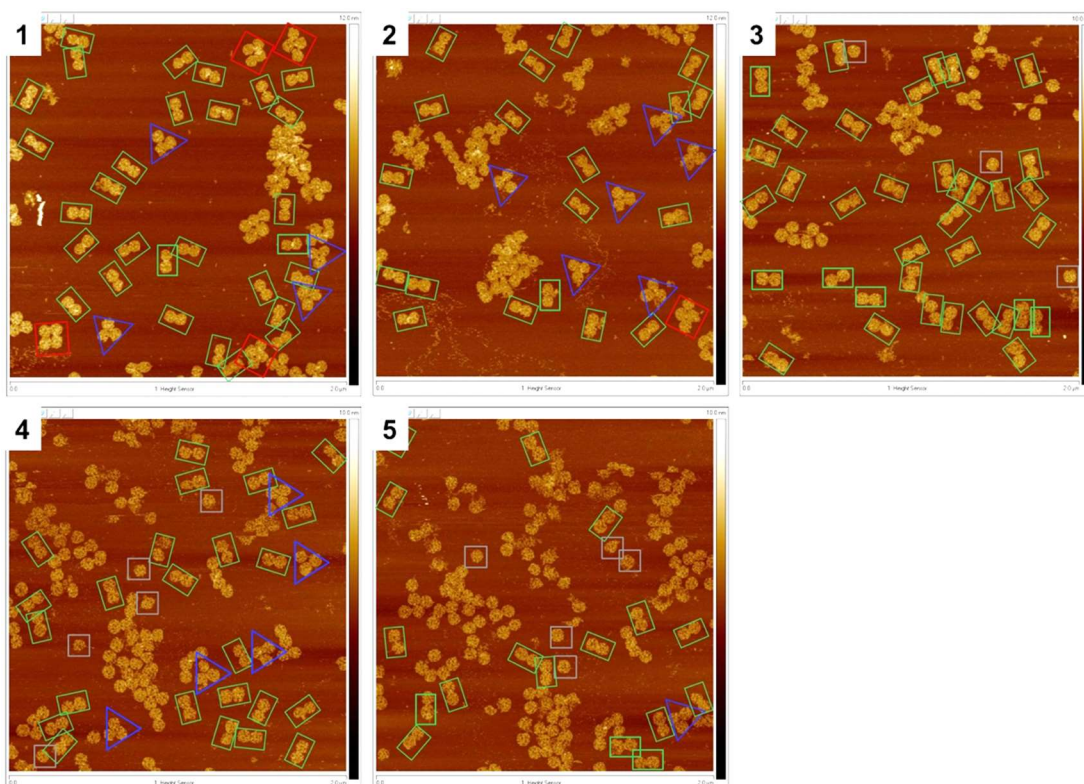

**Figure S10:** AFM images of SnL-SnL dimer structures assembled from 30 nM Sn and incubated at 37 °C overnight for Figure 2B. Structures in single, dimer, trimer and tetramers are indicated with grey, green, blue and red boxes respectively. Structures higher than tetramers are considered as aggregates. Counted numbers of the structures are shown in Supplementary Table S8. All images are 2  $\mu\text{m}$   $\times$  2  $\mu\text{m}$ .



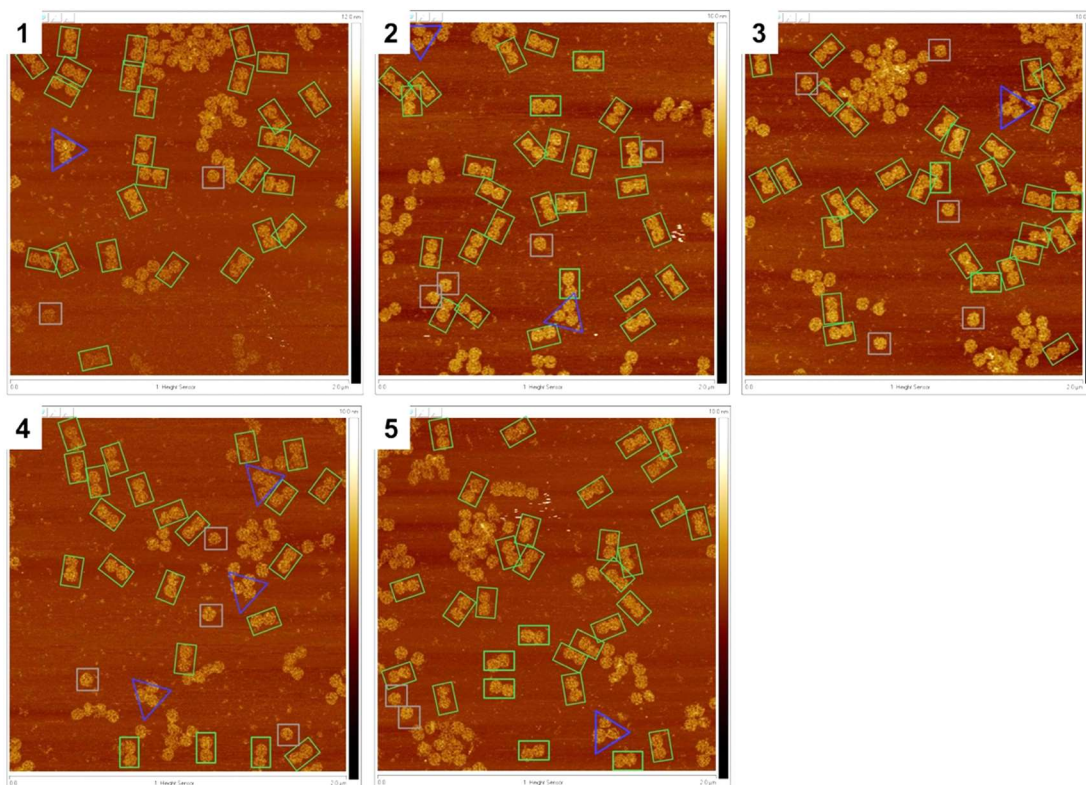

**Figure S11:** AFM images of SnL-SnL dimer structures assembled from 30 nM Sn and incubated at 45 °C overnight for Figure 2B. Structures in single, dimer, trimer and tetramers are indicated with grey, green, blue and red boxes respectively. Structures higher than tetramers are considered as aggregates. Counted numbers of the structures are shown in Supplementary Table S8. All images are 2  $\mu\text{m}$   $\times$  2  $\mu\text{m}$ .

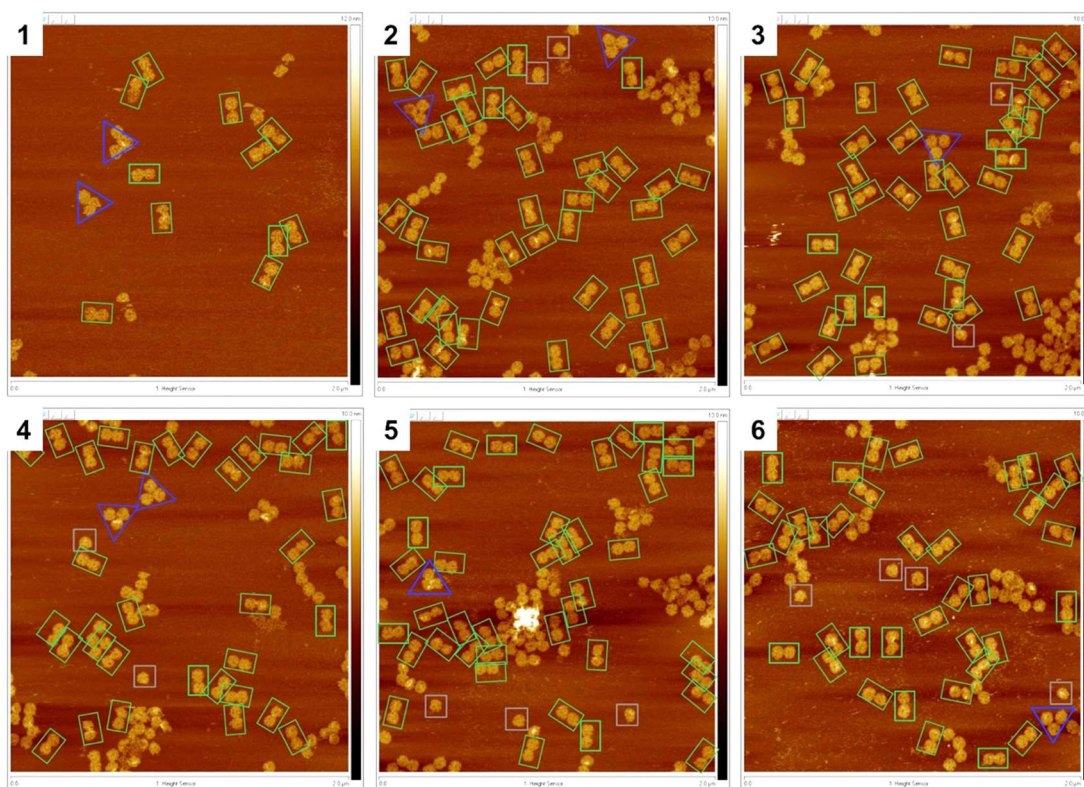

**Figure S12:** AFM images of SnL-SnR dimer structures assembled from 10 nM Sn and incubated at 45 °C overnight for Figure 2D. Structures in single, dimer, trimer and tetramers are indicated with grey, green, blue and red boxes respectively. Structures higher than tetramers are considered as aggregates. Counted numbers of the structures are shown in Supplementary Table S9. All images are 2  $\mu\text{m}$   $\times$  2  $\mu\text{m}$ .

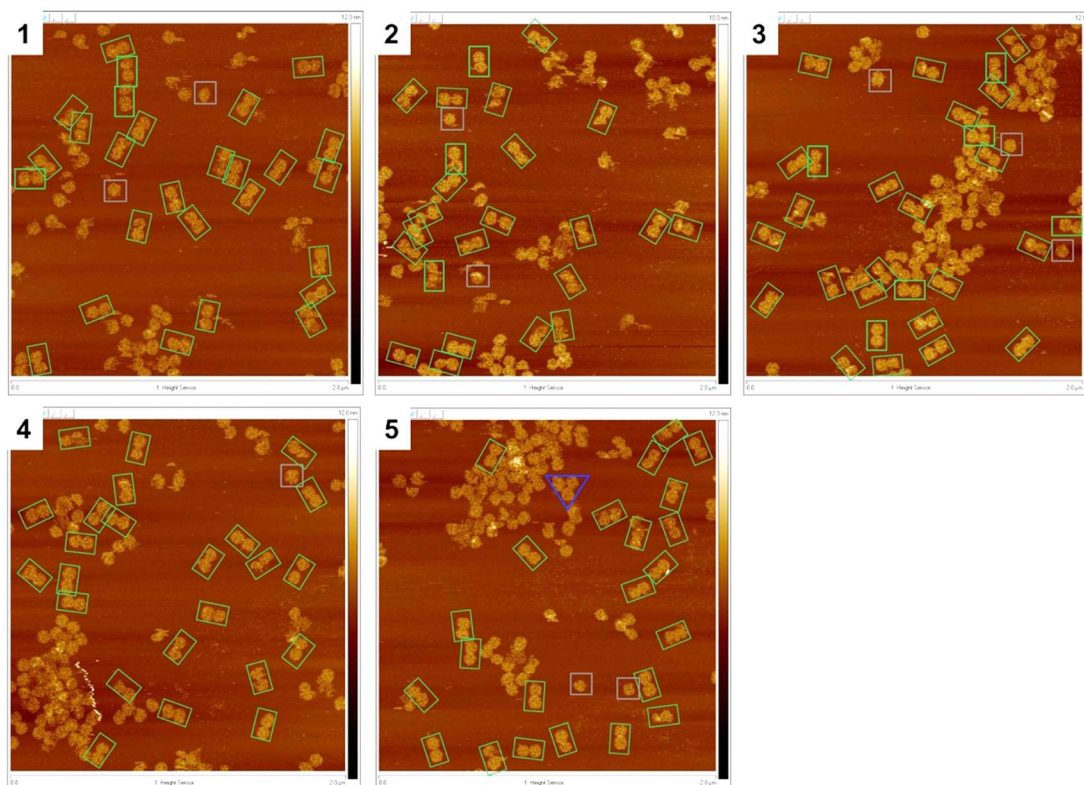

**Figure S13** : AFM images of SnR-SnR dimer structures assembled from 10 nM Sn and incubated at 45 °C overnight for Figure 2D. Structures in single, dimer, trimer and tetramers are indicated with grey, green, blue and red boxes respectively. Structures higher than tetramers are considered as aggregates. Counted numbers of the structures are shown in Supplementary Table S9. All images are 2 μm × 2 μm.

**Table S1: Observed products in SnL-SnL hybridisation.**

| Structures                   |     | SnL-SnL |       |       |       |       |       |       |       |       |
|------------------------------|-----|---------|-------|-------|-------|-------|-------|-------|-------|-------|
|                              |     | 10 nM   |       |       | 20 nM |       |       | 30 nM |       |       |
|                              |     | 25 °C   | 37 °C | 45 °C | 25 °C | 37 °C | 45 °C | 25 °C | 37 °C | 45 °C |
| Single                       | no. | 19      | 8     | 9     | 12    | 8     | 10    | 3     | 10    | 15    |
|                              | %   | 8       | 6     | 7     | 9     | 7     | 7     | 3     | 7     | 9     |
| Dimer                        | no. | 180     | 124   | 117   | 112   | 92    | 119   | 76    | 99    | 138   |
|                              | %   | 85      | 87    | 93    | 86    | 90    | 90    | 66    | 76    | 86    |
| Trimer                       | no. | 15      | 9     | 0     | 7     | 3     | 4     | 20    | 17    | 8     |
|                              | %   | 7       | 6     | 0     | 5     | 3     | 3     | 17    | 13    | 5     |
| Tetramer                     | no. | 0       | 1     | 0     | 0     | 0     | 0     | 17    | 5     | 0     |
|                              | %   | 0       | 1     | 0     | 0     | 0     | 0     | 14    | 4     | 0     |
| Total<br>(particle analysed) |     | 214     | 142   | 126   | 131   | 103   | 133   | 116   | 131   | 161   |

**Table S2: Observed products in SnL-SnR and SnR-SnR hybridisation**

| Structures                   |     | SnL-SnR<br>(10 nM, 45 °C) | SnR-SnR structures<br>(10 nM, 45 °C) |
|------------------------------|-----|---------------------------|--------------------------------------|
| Single                       | no. | 13                        | 9                                    |
|                              | %   | 6                         | 6                                    |
| Dimer                        | no. | 205                       | 127                                  |
|                              | %   | 90                        | 92                                   |
| Trimer                       | no. | 9                         | 2                                    |
|                              | %   | 4                         | 2                                    |
| Tetramer                     | no. | 0                         | 0                                    |
|                              | %   | 0                         | 0                                    |
| Total<br>(particle analysed) |     | 227                       | 138                                  |

## Assembly of Sn Chain structures

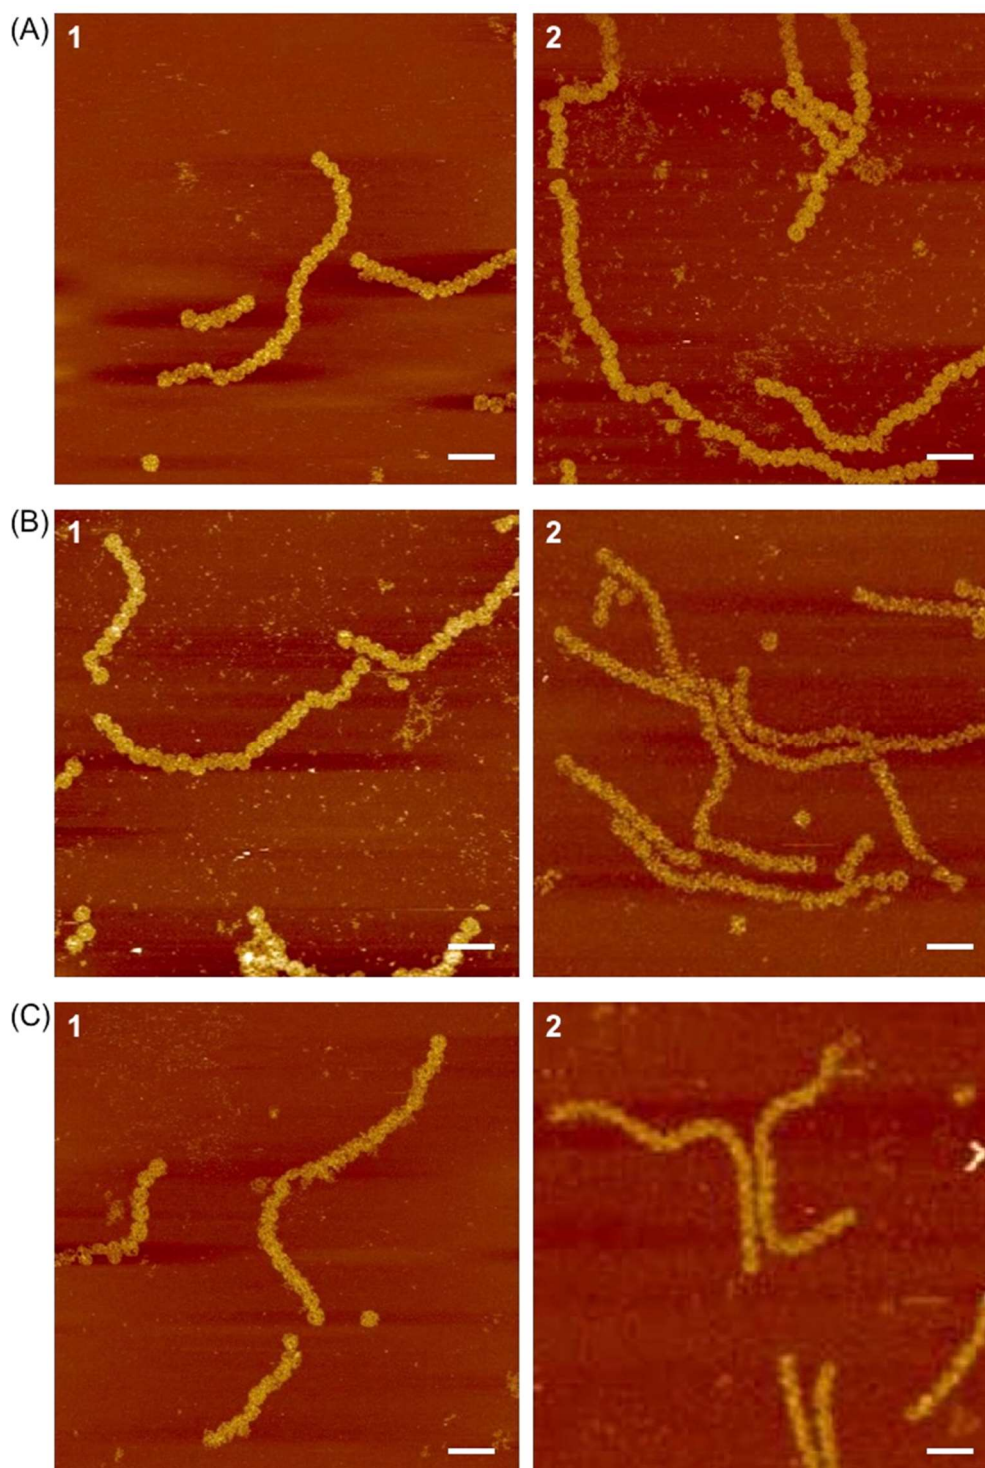

**Figure S14:** AFM images of 1D chain structure of other fields for Figure 4 (upper panel) of (A) SnL-SnL-SnL, (B) SnL-SnR-SnL and (C) SnR-SnR-SnR. AFM scale bars represent 200 nm.

## Streptavidin labelling of Sn Dimer and Chain structures

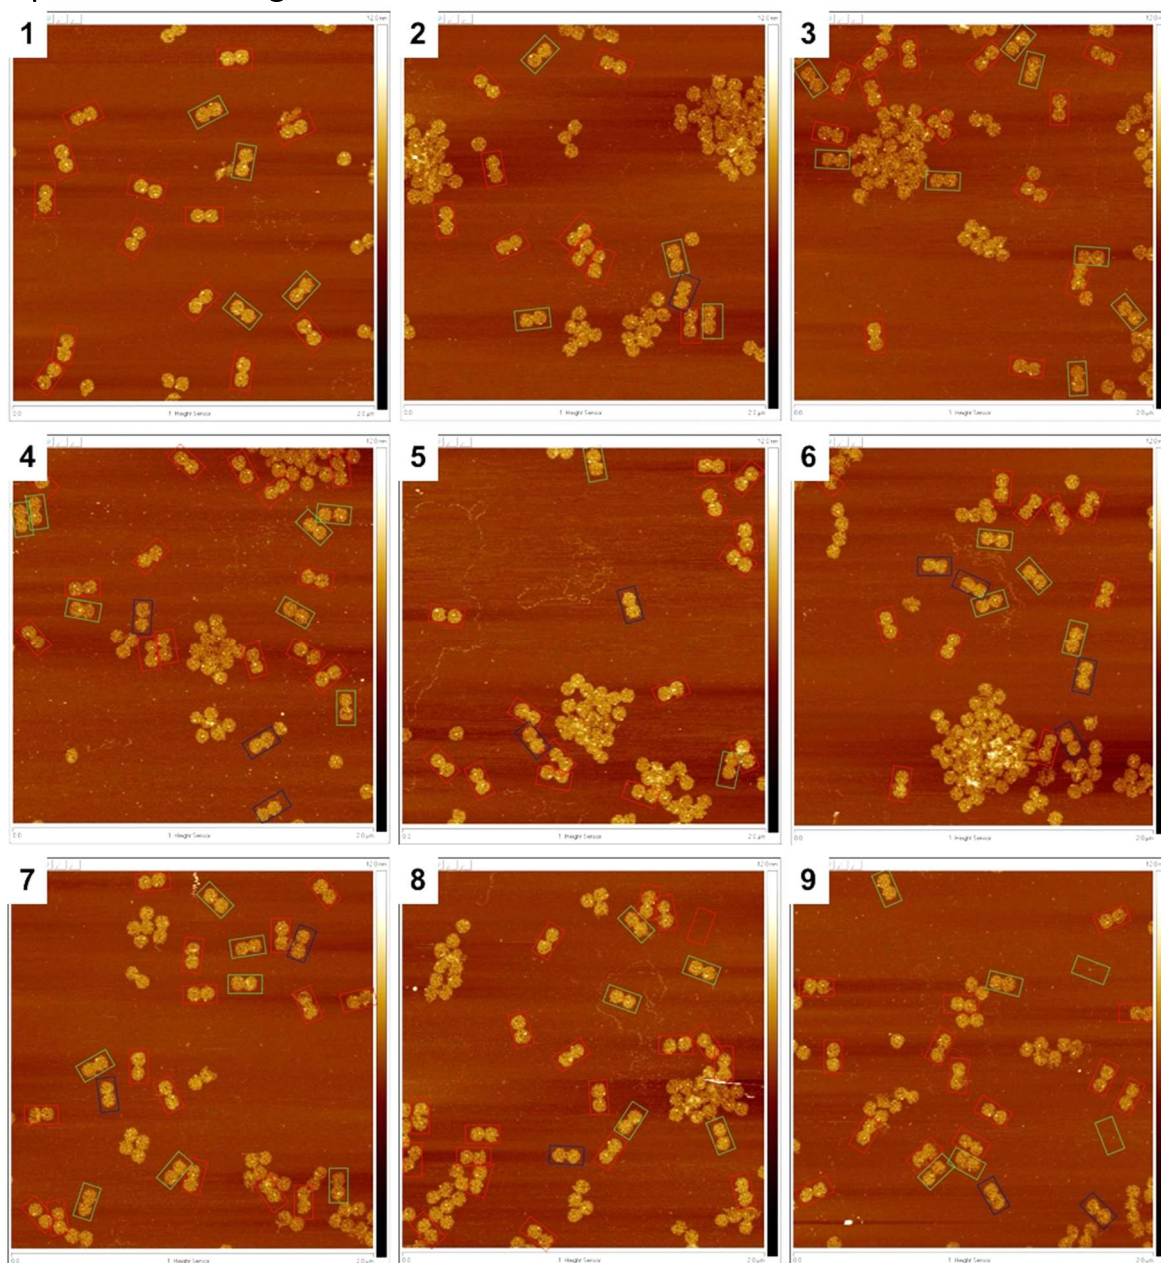

**Figure S15:** AFM images of SA bound SnL-SnL dimer structures for Figure 3C. Dimer structures bound with no, one and two SA are indicated with red, green and blue boxes respectively. Only dimer structures are counted and numbers of the structures are shown in Supplementary Table S10. All images are  $2\ \mu\text{m} \times 2\ \mu\text{m}$ .

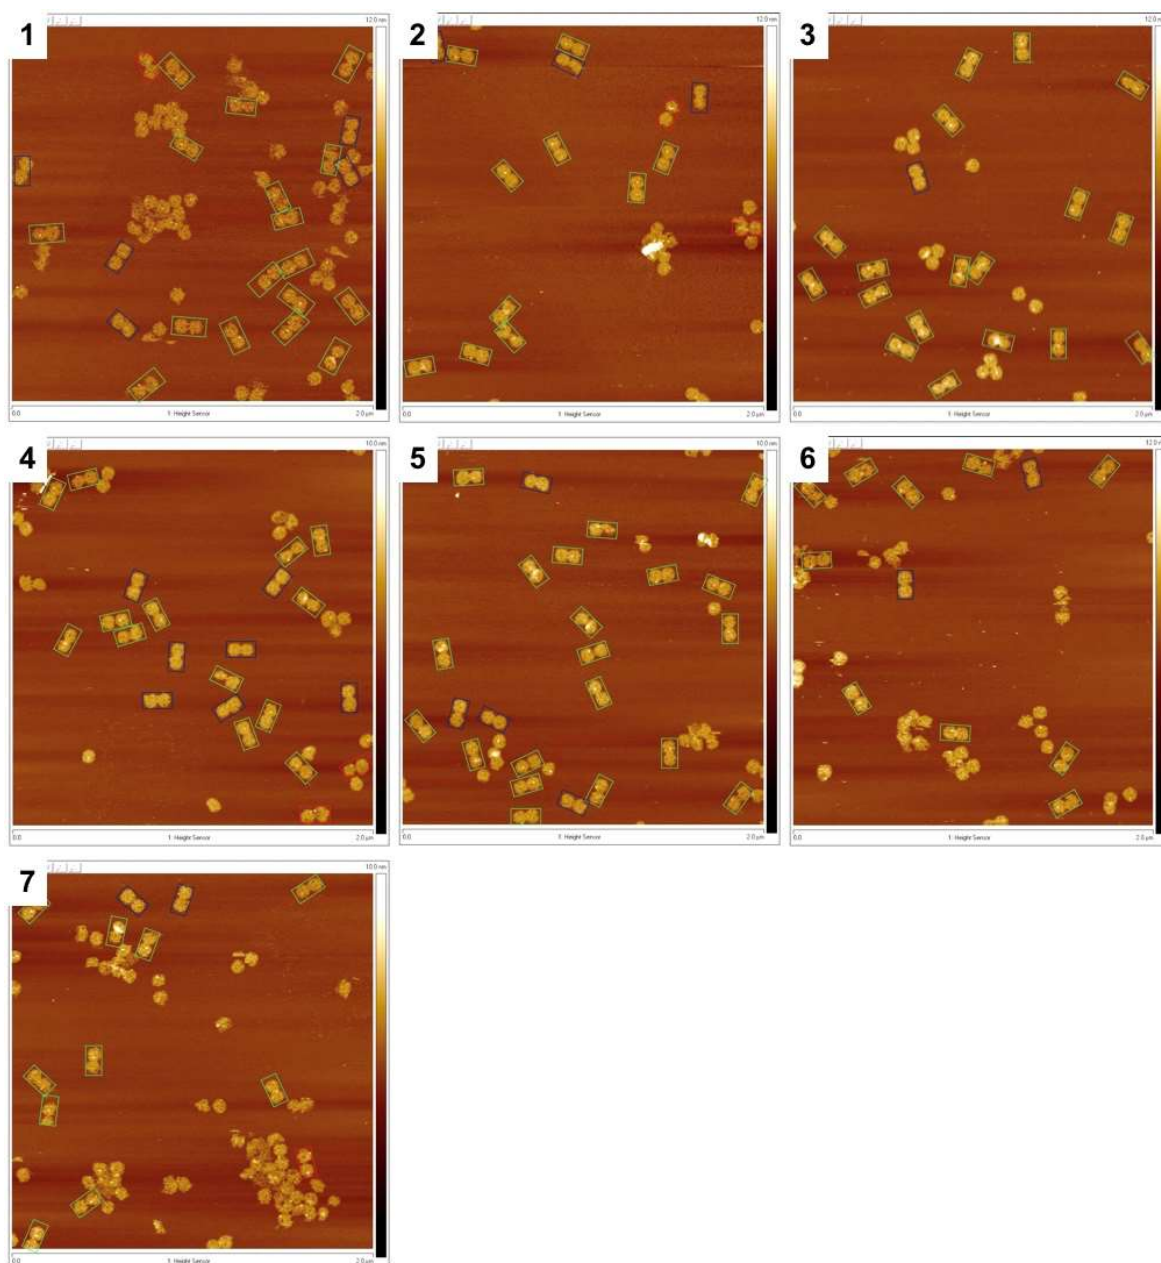

**Figure S16:** AFM images of SA bound SnL-SnR dimer structures for Figure 3C. Dimer structures bound with no, one and two SA are indicated with red, green and blue boxes respectively. Only dimer structures are counted and numbers of the structures are shown in Supplementary Table S10. All images are  $2\ \mu\text{m} \times 2\ \mu\text{m}$ .

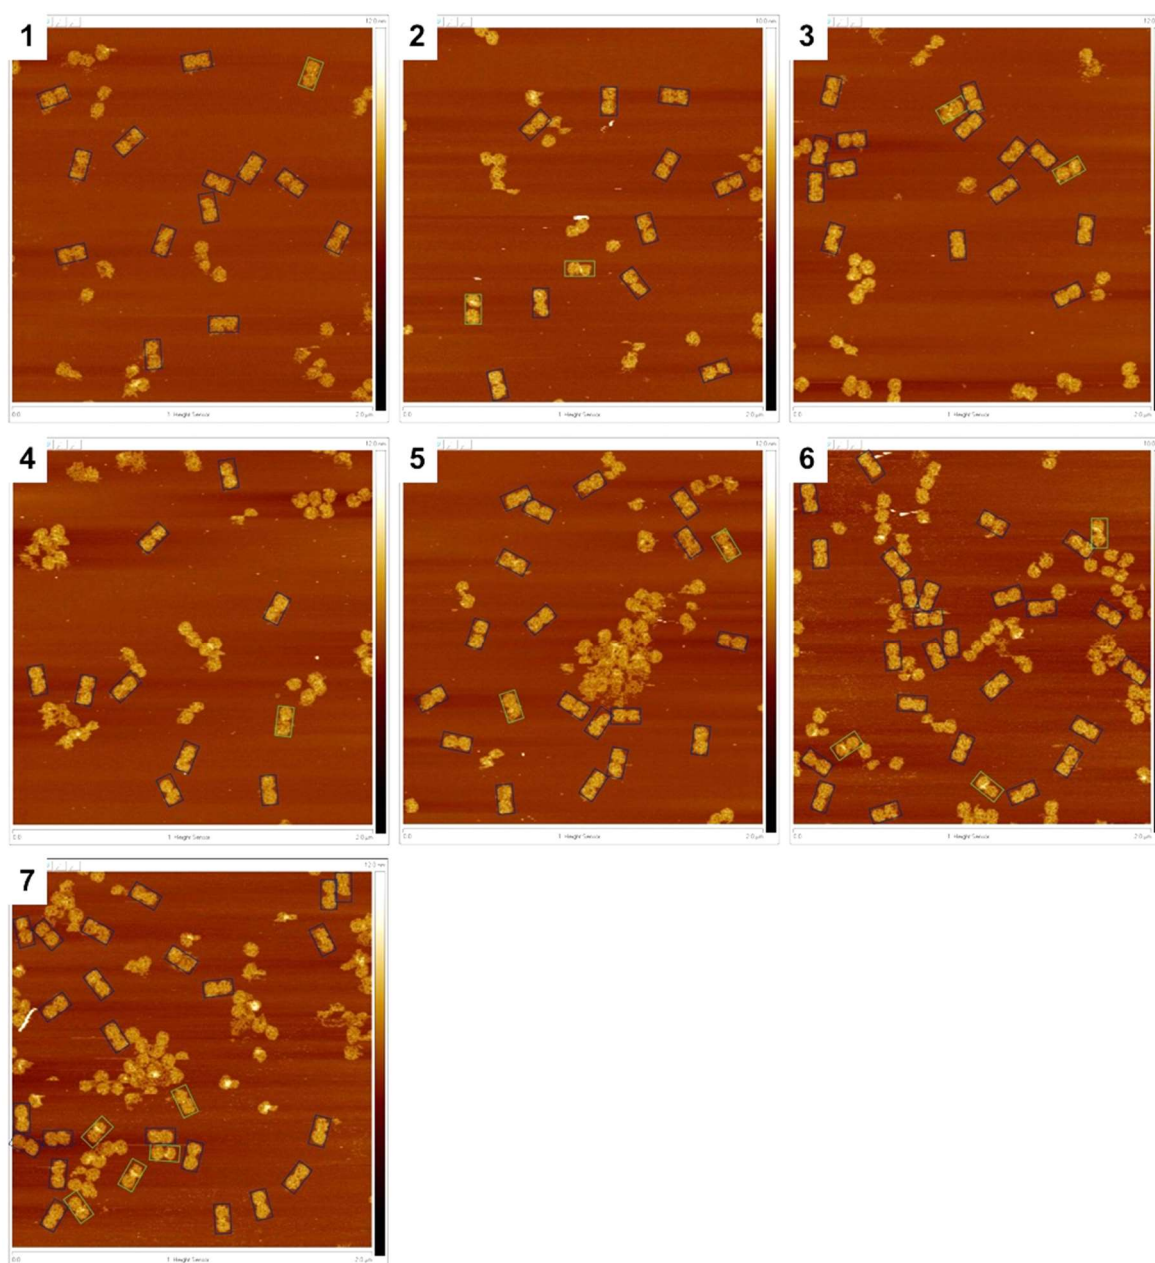

**Figure S17:** AFM images of SA bound SnR-SnR dimer structures for Figure 3C. Dimer structures bound with no, one and two SA are indicated with red, green and blue boxes respectively. Only dimer structures are counted and numbers of the structures are shown in Supplementary Table S10. All images are  $2 \mu\text{m} \times 2 \mu\text{m}$ .



**Table S3:** Observed attachment of streptavidin to Sn dimers

| Structures                   |     | <b>SnL-SnL</b> | <b>SnL-SnR</b> | <b>SnR-SnR</b> |
|------------------------------|-----|----------------|----------------|----------------|
| No SA                        | no. | 19             | 27             | 113            |
|                              | %   | 9              | 18             | 88             |
| Single SA                    | no. | 55             | 117            | 16             |
|                              | %   | 27             | 78             | 12             |
| Double SA                    | no. | 128            | 6              | 0              |
|                              | %   | 64             | 4              | 0              |
| Total<br>(particle analysed) |     | 202            | 150            | 129            |

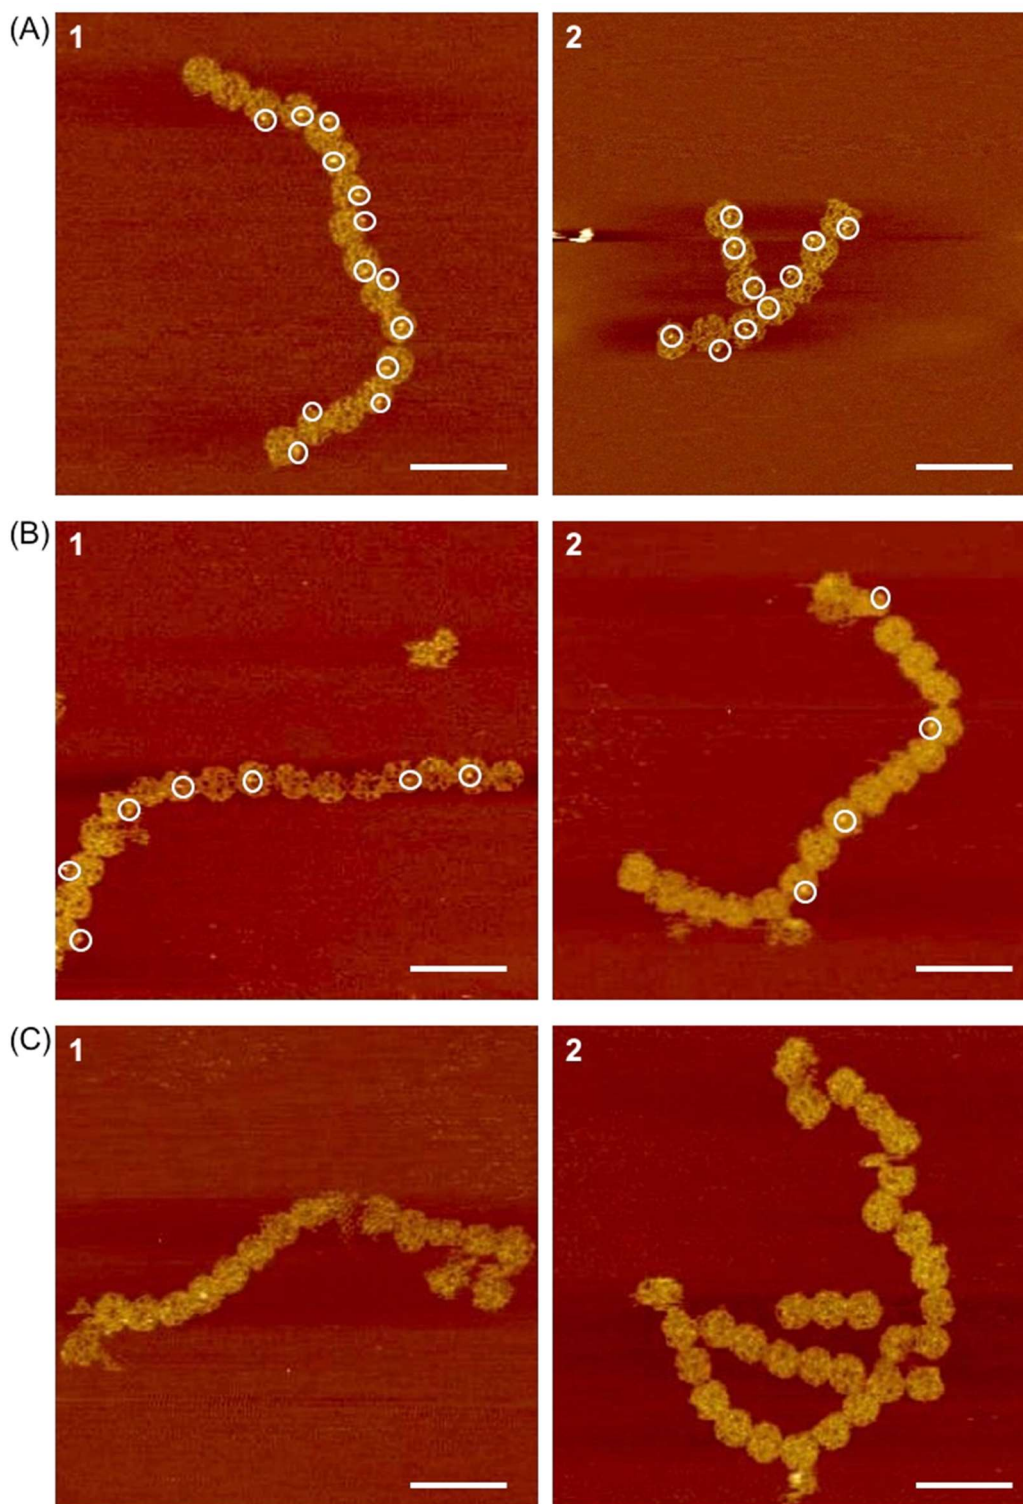

**Figure 18:** AFM images of SA bound 1D chain structure of other fields for Figure 4 (bottom panel) of (A) SnL-SnL-SnL, (B) SnL-SnR-SnL and (C) SnR-SnR-SnR. White circles highlight bound streptavidin AFM scale bars represent 200 nm.

Scaffold and unmodified Staple Sequences of SnL and SnR

**Table S4:** Sequences of the custom scaffold with a total length of 6240 nt

|                                                                                                                                                                                                                                                                                                                                                                                                                                                                                                                                                                                                                                                                                                                                                                                                                                                                                                                                                                                                                                                                                                                                                                                                                                                                                                                                                                                                                                                                                                                                                                                                                                                                                                                                                                                                                                                                                                                                                                                                                                                                                                                                                                                                                                                                                                                                                                                                                                                                                                                                                                                                                                                                                                                                                                                                                                                                                                                                                                                                                                                                                                                                                                                                                                                                                                                                                                                                                                                                                                                                                                                                                                                                                                                                                                                                                                                                                                                                                                                                                                                                                                                                                                                                                                                                                                                                                                                                                                                                                                                                                                                                                                                                                                                                                                                                                                                                                                                                                                                                                                                                                                                                                                                                                                                                                                                                                                                                                                                                                                                                                                                                                                                                                                                                                                                                                                                                                                                                                                                                                                                                                                                                                       |
|-------------------------------------------------------------------------------------------------------------------------------------------------------------------------------------------------------------------------------------------------------------------------------------------------------------------------------------------------------------------------------------------------------------------------------------------------------------------------------------------------------------------------------------------------------------------------------------------------------------------------------------------------------------------------------------------------------------------------------------------------------------------------------------------------------------------------------------------------------------------------------------------------------------------------------------------------------------------------------------------------------------------------------------------------------------------------------------------------------------------------------------------------------------------------------------------------------------------------------------------------------------------------------------------------------------------------------------------------------------------------------------------------------------------------------------------------------------------------------------------------------------------------------------------------------------------------------------------------------------------------------------------------------------------------------------------------------------------------------------------------------------------------------------------------------------------------------------------------------------------------------------------------------------------------------------------------------------------------------------------------------------------------------------------------------------------------------------------------------------------------------------------------------------------------------------------------------------------------------------------------------------------------------------------------------------------------------------------------------------------------------------------------------------------------------------------------------------------------------------------------------------------------------------------------------------------------------------------------------------------------------------------------------------------------------------------------------------------------------------------------------------------------------------------------------------------------------------------------------------------------------------------------------------------------------------------------------------------------------------------------------------------------------------------------------------------------------------------------------------------------------------------------------------------------------------------------------------------------------------------------------------------------------------------------------------------------------------------------------------------------------------------------------------------------------------------------------------------------------------------------------------------------------------------------------------------------------------------------------------------------------------------------------------------------------------------------------------------------------------------------------------------------------------------------------------------------------------------------------------------------------------------------------------------------------------------------------------------------------------------------------------------------------------------------------------------------------------------------------------------------------------------------------------------------------------------------------------------------------------------------------------------------------------------------------------------------------------------------------------------------------------------------------------------------------------------------------------------------------------------------------------------------------------------------------------------------------------------------------------------------------------------------------------------------------------------------------------------------------------------------------------------------------------------------------------------------------------------------------------------------------------------------------------------------------------------------------------------------------------------------------------------------------------------------------------------------------------------------------------------------------------------------------------------------------------------------------------------------------------------------------------------------------------------------------------------------------------------------------------------------------------------------------------------------------------------------------------------------------------------------------------------------------------------------------------------------------------------------------------------------------------------------------------------------------------------------------------------------------------------------------------------------------------------------------------------------------------------------------------------------------------------------------------------------------------------------------------------------------------------------------------------------------------------------------------------------------------------------------------------------------------------------------|
| <p>GGATCCACGCGCCCTGTAGCGGCGCATTAAGCGCGGGGGTGTGGTGGTTACGCGCAGCGTGACCGCTACACTTGCCAGCG<br/>         CCCTAGCGCCCGCTCCTTTTCGCTTTCTTCCCTTCTTTCTCGCCACGTTTCGCCGGCTTTCCCGTCAAGCTCTAAATCGGG<br/>         GGCTCCCTTTAGGGTTCCGATTTAGTGCTTTACGGCACCTCGACCCAAAAAACTTGATTTGGGTGATGGTTCACGTAGTG<br/>         GGCCATCGCCCTGATAGACGGTTTTTCGCCCTTTGAGCTTGAGTCCAGCTTCTTTAATAGTGGACTCTGTTCCAAACTG<br/>         GAACAACACTCAACCCTATCTCGGGCTATTCTTTTGATTTATAAGGGATTTTGCCGATTTCCGGGTACCGCATGCCTCGAG<br/>         TTAGACCTGATCTTTGAGAAACAAGGCGGCTCCCACTGAATCCATTGATCCTGATTACTGAGCACCTGCACGACGAGGAT<br/>         CTGCTGGAACAAGCTGACCTTCTTAGCCAAGATGCTAGGAAATTCCTGCTCACACATGCTGTTGTTGTTAGTAGGTGCGCCA<br/>         CAAAGCGCGCTCCCGAAACACAGAGTCTGGTACAGGGAAGGCAGAGCGATCTTCAAGGTTGCCACAGCCAGGATCTCTC<br/>         TTGATCGATCCATGAAGGCAACTGGTCCCTGATCTTCTGCTGGGAGTCGGCTTTGCGCAACATGTCTCCGACCACCAGCC<br/>         AGTGAAGGTATCCATTTCGTTCTCTGGAACAATTCGGATGCATACCTCTGACGAAATGCAGGGCGAACATCAGCTGGTC<br/>         GGCTTGAACAGGCAGCGGCAGATGTATTTCGTACACCATGTGCTGCAGGGAGCTGATCAGGGATTGAACTCCTCTGTTCTGT<br/>         GTTCTCAGAATCCTGCTTATTCTGGAGTGCCCTTTGAAACAACCTCAGAAAGGCGGCCAGGGAGAACCTGTACATATTTATT<br/>         GATCTTGGAGAGTTCAGAGATAATGAAGTACATCTTTGAAGCAGACTCAGCGAGTGGCAGATATCGCTCGCGCTCCTGGTC<br/>         GAGAGAGATTTGCAGCTTATAAGATTCTTTCAGAGACTCTTGGATGAGGGCGGAAGATGCTTTAGTCTGATTCAGAGATC<br/>         GATCAGGTCTTGTCTCCAGGATGTTGCCCTGAGAAGTACCAATGCTCTCCAGCAGAGATTCTTCGAGTTTGGCCAGTTG<br/>         GATCTTCTTATCCTCCTCTGTTGGAGCAGCTTAGTCTTCTGTTCTTCCAAATCGGGTTTCTCATGTTGGATGGTGAGGGC<br/>         CAGGAGCTGGCCTCTCAGTCTGAGCGGGTGGTTGTGAAATTAACCTCTGTGACGATGCTGGCAGCGTCTGGTGAATGAA<br/>         TGGGTTGGGATTCCTAGTGCTCAGGAACAGGCGAACTCCTCGTTATAGTCGATGATCTTATCTCCAATCTGGACCACATA<br/>         GCGTGGGCCTTGGGCCACCAATCTCTGCGCAACAGAGGGTACAGAACTGGCTCCACGCCATCCATCTCCTGGATGATCAA<br/>         GGCTTGGCGAAGCGGACGGCGAGTTCAGGGCAGTATGAAGTTGGAGTCTTGGTGGTGTATCACTCCAGCCTGGAACT<br/>         CTTCAAGTGAGTCTCAGCCACTCAGTAGCCTGTGAGCTGGGATCGATGAGGAAAGGCAACCGCGGATTCGAAGATAAC<br/>         CAGTGCGTTCCTCGATTGAGAGGTCACTCGCTGGGCAGACCTTCAGACTTCAGATCAGCTGCTCTGACTCGGTGCAGAGAAA<br/>         TCTTCTCAGGTCAAACCTTCTCCAGGCCGCGAGACTTGGTCCACTCCTCCAGACATGTCTTCTGAGAGACTCAGGTGCAGC<br/>         GGACAAGTAGGTGATAAAGGCTGCGGCCAACTGAGCCCTCTTTGGGAGGGTTGCCAGTCTCAGTAATCTCGACGACCTG<br/>         AGCATTCATCTCTGTGTTCCGGTCCAGCTGATTAATCAACACTTCAGCTGCTTTGATAGTCTCCTGAGCCTTGGACAC<br/>         CTCAGCTTCCAACCTAGTCTCTGAGGTCCTGCTGAAATTTCTCCTTCAGTCTGACACCTTCTGACCGACAGAAT<br/>         GAGGATTCCTCCAGTTCTCTTCTATCCTCGTCTTCTTCCAGGTTGCTTTCCAGGCGGCTTGTCTCAGCTCCAGAGG<br/>         GTGGATGCGTTCGAGCACGTGAGAGTACTGGATATTGGCCTTAACCCAGGCTGCCAAGGGTGCAGCTGCAGTTGATGCTCT<br/>         CTTAGCGTTCCTGGGATCAAATGAACCTTTATTCTTGAACAGCAGTTCCTCCACAGATTCCCTAATTTCTTGGAGATGTT<br/>         CCTAGCGTCGAAAGTAGCAATGTCTCCCTGACACCGCGCTTGGCCAAAGAAAGACTTCATAGACACCCAAGAGGTGTCAA<br/>         GATACCCATCAAGCCGAGGACGCCCTCCAGGATGTCCGGATAACGCTCGGTGGCATTCAGTGACCTGATCTCTGAGAG<br/>         AGACTCTGGTTTGATATTACCCACGGCGAGCTTGGCCTCGTTCACCCAGAGGCTGCACCTCTTTGAGTTCGTCGTCATCTT<br/>         GTTCTTCTCTCCGATCTTGACCACCTCCTCTGCGATCGGGTGTCTCAGCCTTCCAGCTCTGCTTCTGCTCGGAAGC<br/>         ATCCTGCATAGACAGGTAATCATTTCAGGGCAGCGCTCAGCTTCATCTGCTTAGTCTTCCAGGAGGACTGATTTGTCGCC<br/>         AGCCTTGGCATTGAGTTCATCCACCAGAGCTTTGGCTTCGTTGAGTTCGCTGACTCCGGCCTGCAGATGAGATTGGCGCTT<br/>         CAGCAGCTCCTTCTTCTTTGAGCTGGAGATGGCGGAATAGACGTGGAGGAAGGTGATGACTGGCTAGGAGTAGCTCCGTA<br/>         AGCTTTGCAAGACTCGTGGATCAGCAGGAAGCTCTTGAAGAAATCAGGATCGACGGAGTTCCTTCTTCTCCTCTTTGGG<br/>         CTTCTTGTGCTTGTACTTCTCACCGCCTCCAGTCTCGCTAAACAACATCTCGGGAATCTTCTTCATAGAAGAATTAGACCA<br/>         ACCCTCCATCCAGAGGACCTGGCACTTCTTATGGAGGGCGGGATGCTCTCGCAATTGATCATGAAATTTGAAATTAGCGCT<br/>         GTCCATAATCAGCACAATGTGGAGATCTGTTGAAATCGCATAGGTGAGTAAATGAACTGGGCGGAAGAAGCCGCTCCTG<br/>         TGATGCTGATCCTTCAATGGGAGGAGCAGTGGCTCAGGTTCTTCCAAAGTGTACAAGCCGGGCGGCTCCAGCAGGACAG<br/>         CAGGGAGTTGATCATCTCCAGGAAGGTTGGGTGGACGAATTGATAGTCTTCCAGAGGAGGACGACCTGCTGGGCTCGAT<br/>         ACCGGCAGGTTGCAAGACGTGTTTTCAGATCGTCTTGAATTGCTTGGTTCGTTAGTTCGTTAGCTCTGCTGATCTTTGGAGAGACAG<br/>         GACGCTCCATGCATATGGCTGACCAGAGAAGTAATAGTGCCTTCCAACTCCAGAGCGTCCGGCCAGCAGCAGTATCC<br/>         ACCAGGGAAAGACAGGACGCGATCAATTTCTGGACATATACTCCAGGACCTCGTGGAAACAACAGAATGTCCAGGTTCTGGTT<br/>         GTCGCGGCCGTAGTGAATCAGGCCCTTCTTGTACAGTCTTCAAGTCAAGTTCAGTTGAGTTCAGTTTGGCGAGAGGCTTGGCATG<br/>         AGGTGGCAATGGTTGGATGTTGAGCAGCCCTTGACCCGAGTGTGCTGGCTCCCATGTCACATAGAAGGAATCGGCAT<br/>         ATTTATCCAGGATATCAGAGCCCCAATCACCTTGAACACAGAGGTGAGGATAATATCGAACAGATGCAGTTTCTTAGCGCC<br/>         AACAATCTTATCTTAAAGAGCCTGCGGGCTTCGTAAGCCACGATTTTCAGGACATAATCCAATGGGTGGTTTGTAGAGCC<br/>         TCCCTCCAGGTCATAGCGAAACAGTCCAGAACCATTTGTGTCAGAAATGCAGGGTGTGAAGAAGTAATGTGAGTAATCATC<br/>         GACCGTGAACCTTGGCGCGGACTTGTTCGTACACCTGAACCATAGAGCCAGCCAAGAGGTAGATCTTGTCTGATGAGCCCA<br/>         GATGCTATGGTCTTCAAATTTCTTGTGGAGGACAGGTTTCAGGTTAGGGCCATAGATGGTCTGCAACTGTTCCGCGCTCGGG<br/>         ATAATCGATTGAGCACAGTCTACAATTTGATGTAACCTGGTGGTGGCTTATGCTTCCCAACTACCGCGGAGAGACAT<br/>         GGAAGCCACAATCTTCCGCTGAGCAGCCCTTGACCCGAGTGTGCTGGCTCCCATGTCACATAGAAGGAATCGGCAT<br/>         GCTGGACCGTATGGGTTGCCTCCAGGCCATCTTCATAGCCTGTGTCAGGTTAGGTAACACTTGTCTGAGTGGAGTG<br/>         TAAACGAGCTTGTGGCATTCTTCTTGGTACTCATAGGTGACTGGAACCTCGCTGTCAACCATCTGAACGCAACAGGTGTGG<br/>         TCGACTTCATGTAGAACCCTCAACTGCTTCTTCCAGGCCAATCTTCCGTGGTGTGCACTTGGATTTGGTTTCCAGCTGCTTG<br/>         ACCACGTGATGTTATGGATAATGTCGAGAATCAGTGCTTTTCAAGTTTCAGCTCCAGAATACCGGACTCTGTGTTACCTGGG<br/>         TCTTCGGAAGATGTGTCATGTTAGTATAGTCTCAATTTGTTCCAGCAGCTGTGCTCAATCTGGTGCAGGAGAGTATCT<br/>         TTAATTCGATTCACATCTTCGGTAAACTGTATCTTGGCCAAAGCAGCACAGGATCTGTGATGGGAACAGAGAGAGGTTCC<br/>         ACAGCTCCCTGAGAGCTGCGTCCGGTGTGTCAGCACTCCTTTCAGCAGCTGCTCCAGGGTCTTCTTCTCCTCCAGGGCCAGA<br/>         TCGTTTCAGCCAGGTTTCGACGTTATTGGACAAGGGCACCTTATTCTTGAATGGCACAACCTTCTCCCTCCAAGGACTTCATT<br/>         GCAGTAATGTGCTTAGACTTCTCATCGAACAGACAGAGTTGATACCAGCAACAGCTTCTTGGAGGTGAGACTGAATCAG</p> |
|-------------------------------------------------------------------------------------------------------------------------------------------------------------------------------------------------------------------------------------------------------------------------------------------------------------------------------------------------------------------------------------------------------------------------------------------------------------------------------------------------------------------------------------------------------------------------------------------------------------------------------------------------------------------------------------------------------------------------------------------------------------------------------------------------------------------------------------------------------------------------------------------------------------------------------------------------------------------------------------------------------------------------------------------------------------------------------------------------------------------------------------------------------------------------------------------------------------------------------------------------------------------------------------------------------------------------------------------------------------------------------------------------------------------------------------------------------------------------------------------------------------------------------------------------------------------------------------------------------------------------------------------------------------------------------------------------------------------------------------------------------------------------------------------------------------------------------------------------------------------------------------------------------------------------------------------------------------------------------------------------------------------------------------------------------------------------------------------------------------------------------------------------------------------------------------------------------------------------------------------------------------------------------------------------------------------------------------------------------------------------------------------------------------------------------------------------------------------------------------------------------------------------------------------------------------------------------------------------------------------------------------------------------------------------------------------------------------------------------------------------------------------------------------------------------------------------------------------------------------------------------------------------------------------------------------------------------------------------------------------------------------------------------------------------------------------------------------------------------------------------------------------------------------------------------------------------------------------------------------------------------------------------------------------------------------------------------------------------------------------------------------------------------------------------------------------------------------------------------------------------------------------------------------------------------------------------------------------------------------------------------------------------------------------------------------------------------------------------------------------------------------------------------------------------------------------------------------------------------------------------------------------------------------------------------------------------------------------------------------------------------------------------------------------------------------------------------------------------------------------------------------------------------------------------------------------------------------------------------------------------------------------------------------------------------------------------------------------------------------------------------------------------------------------------------------------------------------------------------------------------------------------------------------------------------------------------------------------------------------------------------------------------------------------------------------------------------------------------------------------------------------------------------------------------------------------------------------------------------------------------------------------------------------------------------------------------------------------------------------------------------------------------------------------------------------------------------------------------------------------------------------------------------------------------------------------------------------------------------------------------------------------------------------------------------------------------------------------------------------------------------------------------------------------------------------------------------------------------------------------------------------------------------------------------------------------------------------------------------------------------------------------------------------------------------------------------------------------------------------------------------------------------------------------------------------------------------------------------------------------------------------------------------------------------------------------------------------------------------------------------------------------------------------------------------------------------------------------------------------------------------------------------------|

GATGGATTGGTTGACTGGCCCAAGATCTCCAGCAGGTCATCGTCTCCGATGAAGTAGAAGCGAGGGAAAGCGCTGCGCTTC  
 TCCTCCAGGAACCTCGTTGAGGCTGCGCTGGCATCTCTGCAATTGGTCCAGGATGGTCAGCAGTGAGTTGCGAATGCCTGCG  
 TGGGTAGTCAAGGTTGTGACGCGATTGTCTCTTCTGATATCTGTCAATGATGCTGCGGAAATCTTCATCCACCCTGTTGAAT  
 CTGGTCTGCTCTTTGGCGAGGCTCCGCGACCAAGATTGGTTCAGGTAACCCACTTCTCTGAATATGGTTGAGGTTTC  
 TGCAAATATTCGTTCCAGTTCCGCGAGTTTCTTTCCAGATGCTGACCTTGTCTTCAAAGCCTTTATAGTATGGTGAGTCC  
 TTCAAAGGACTGCAGGAGGCATCTATTGTGCGCCACCTGGTTGACGATGTCCTTCCAATCCTTGATCAGCTTCATGGTGCGG  
 CTCTGGGAGTCCATAGTCGATCAGTGTGAACACAGCACCCACGCCCCAATAATCCAGTTCCTGAGTGCTTCGCGGATG  
 GTCACCTTACCCTGGGCGCGTGTGAGTTCAGATCTTTCAGGTGAGCAGCCTTGGCCACGATGGTATCGGCAACTCTCAGCAGG  
 TCACCGAACAGCAGTTTCTCCAGAGATGTGCCGCGAGGCAGACCCAGCAAGCGGAACAGATCCAGCCAGTGATCGGGTGAC  
 AGGTGTTCTCCGCGGACGTACTTCAGGATAGGGATAACAATCTTATATTTGTCCACCTCAGATTGGAGCTTGACAGTCAATC  
 ACAGAATGCTCCTCCACTTTCCTGAGGCGGTCTGTCGCAATTCATCAGAACTCCTCAAACAAGTAGGTTCTAGTGCGAAAG  
 GTGATCCAATCTTCATTGGCCATTTCTTGAATCCCTGCTGGAACCTTTCGTAGAAGGCCCAAATCTGAGCACAGGACTCA  
 ATATCCTTGCTGATGCTGGAGGCGAGAGAGAAGTTAGGTTCTTCGAGGCGGAAGTGGTGACAGTCAATCGACCAGCTTCTTG  
 CGTGTCACTTCCAAATCGTCAGAACCGGTAATACCAGCAGCAGTAAACAATTTCTAACAGACCATGTGGTCTCTCTTTTCG  
 TTT

**Table S5:** Sequences of the staple strands for SnL without any modification.

| Sl. | Sequence                          | Sl. | Sequence                                       |
|-----|-----------------------------------|-----|------------------------------------------------|
| 1   | AAGGAAATTAGCCGTACAG               | 73  | TCGTCACAATTCACCAGACGCTTCTAAATTC                |
| 2   | GTATTACCGGATTGCCACGA              | 74  | AGTCTGGAAGCATCTTCCGCCGTGAGCAAT                 |
| 3   | ATATAAGATTTTTGTGGGGC              | 75  | CCCGCCCTCATGATCAATTGGACATCCAAG                 |
| 4   | AAGGATTGGAGATGAAGATT              | 76  | GGACCTGATCAGGGCAACATCTGGGCCAGC                 |
| 5   | TTGATCCCAACAGAAGCAGC              | 77  | TCCTGGCCCGCTCAGGACTGAGAGAGAACAA                |
| 6   | TCAGCTGGACAGGTGTGCC               | 78  | CATAAGCTTCTGCCGCGGTAGGTCTCACCT                 |
| 7   | ATCGATCCCATGGCAGAAA               | 79  | TGACACAGACTGACAAGTGTACTGGGAAGG                 |
| 8   | CTCAGTAATCCATACCCAA               | 80  | CCCTGCTGCAACCTTCTGGAGATCATTGTG                 |
| 9   | TCATCGGAGACCCTGGAGCA              | 81  | CTGATTATTCAACAGAATCTCCAGATCAACT                |
| 10  | CCCATCACAGAGTCTCTCTC              | 82  | GGTTAAGGTGCAGCTGCACCCTTGCCTGCGC                |
| 11  | CAGTCAAAGAGGTGGTCAA               | 83  | TTGATGGGCATCCTGGAGGGCTGCAGCCTG                 |
| 12  | CTCGCCGTCGTGTGAGCAG               | 84  | CTATCAGGCAACGTCAAAGGGCGAAGTTCCA                |
| 13  | CAGAGGATTCGAGATCTGG               | 85  | GCAGGGATGGCCCTTCTACGAAGAAAACCGT                |
| 14  | CTGGAGTTGGTATCCTGGAT              | 86  | GAACCTGGGATTCACTACGCCGCTTGGAAC                 |
| 15  | CCTCTGTGTATCTGGGGCT               | 87  | AAGAGTCCGAGTGTGTTCAGTGACAACCA                  |
| 16  | GGCACTGGTAAGCACTGATT              | 88  | AATGGGTTTCTTACACCCTGCATAGCATCT                 |
| 17  | AAGAATCTCTGTCTCCCTG               | 89  | GGGAAAGGTTTGAAGACAAGGTCTCTGACAC                |
| 18  | ACGATCTGAATGTGAGACTG              | 90  | TTGCCCTTCTACATGAAGTCCGACGCGCCAA                |
| 19  | GGCCGCGAACTGTACACTT               | 91  | GTTACCCTGTACGAACAAGTCCCACACCTG                 |
| 20  | GCATTGCAAGTCTATGAAG               | 92  | TGTGGTCTTTGGTGGCCAAAGGCGGAGTGG                 |
| 21  | ACTAAGCTGTCCAGGAGAT               | 93  | ACCAAGTCAAAGACATGTCTGGACCACGCTA                |
| 22  | CAAATTGGAGACGAGTCTTG              | 94  | GACCTCTCTCAAAGATGTACTTCAAATACAT                |
| 23  | GCCCAGTGTTAAGAAGAAGA              | 95  | CTGCCGTAGCACATGGTGTACGTTATCTCT                 |
| 24  | TCACCCTACGCAAGAAGCTGGTTCGCTGCGC   | 96  | CCTCTTGGTATCGAGGCCAGCAGGAGCGCG                 |
| 25  | GTAACCACAAGTGTAGCGGTCACGATGACTG   | 97  | ACGCATATATCTCTCTCGACCAGGTCGTCT                 |
| 26  | GATCACTGGTCCGCGGAGAACCCGCACTAA    | 98  | GAACATCTCCGGCGCGTGGATCCAAACGAAATTCGAC<br>GCTAG |
| 27  | GACCTACTATTGGATCACCTTTCTGTACCC    | 99  | ACTGCTGCTGCCGCTCAGGAAAGTGGAGGATAGAAT<br>TTGTT  |
| 28  | CCTTGAAGGGGACAATAGATGCCTTGAAGTG   | 100 | AGGTGGACAAGTGGGTGCTGTGTTTCACTGGTCCA<br>ATCTG   |
| 29  | ACCATCCGCTCACGCGCCAGGGCTGCAGT     | 101 | GAAGCTGATCTCCGAGCATCATGACAGATAAGCCG<br>ACCAT   |
| 30  | CCTCAACGCCAATTCAGAGATGCGCCCTGC    | 102 | AAAGGTTCAATTAAGTTGGAAGCTGAGGTGTCTGTCA<br>AGAAT |
| 31  | CCAAAGAGATCTTTGGTTCGCGGACAGCGCAG  | 103 | TGTTGATTAAGCGATGACCTCTCAATCGAGAGCAGC<br>TGAAG  |
| 32  | GAGTGGCGCTCAGGTCGTCGAGATGTCAGA    | 104 | CCCTTCTCCTCGGAAGGGAAGAAAGCGAAAGTCCCG<br>GTTT   |
| 33  | ACTGAAGGCTGTCGGTCAGAAGGTTACTGAG   | 105 | CGTGCAGGTGATCAAGTTTTTGGGGTTCGAGCAGATC<br>CTCGT |
| 34  | GGCTGGAATGAAGACTCACTTGAAGTGCACC   | 106 | CGCTTCTACTGCTGTGAAGGAGTGCCTGACGCGCTT<br>CCCT   |
| 35  | GAGTCAGACCTGAGAAGATTTCTGGATTCCA   | 107 | CTTCTGTGTAGAGATCAGGTCAGTGAAGAATAGCTGTG<br>GACC |
| 36  | TAGAGCTTGAACCTTAAAGGGAGCGCATCAG   | 108 | CCGCCATCTCGATCGAGGAGAGAAAGAACAACCAGT<br>CTATT  |
| 37  | CAAGGATATCTCTCTCGCTCCACCCGATT     | 109 | TGCCCTGGAAGAATTTCTAGCATCTTGGCTAACTTCA<br>TCAC  |
| 38  | GACTTGAACCTCTCGGAAAAGTGCACATCT    | 110 | GAACACAGAAGCTGTGGCAACCTTGAAGATCCAGGAT<br>TCTGA |
| 39  | CTGGAGAAGGGTCTGCTCGCGGACTCAACT    |     |                                                |
| 40  | AGATAAGATTACGAAGCCCGCAGGGCTGCTC   |     |                                                |
| 41  | CAGGCCAAAATCCGGTGAAGGCTCTTTAG     |     |                                                |
| 42  | CCATTGGACTGGAGGAGGCTCATCATCGTG    |     |                                                |
| 43  | GCCAAGGCGAGAGTTGCCGATACCAACCAC    |     |                                                |
| 44  | GATTTCAGGTCAGGTCACCAACCAATAACCATA |     |                                                |
| 45  | TTCAAGATATTTGCAGAACCCTCCATCCGT    |     |                                                |
| 46  | AACGCAATATCAAGTTTACCGAAGCCTGGCT   |     |                                                |
| 47  | GAACGATCCCAATAACGTCGAAAATGTGGAG   |     |                                                |
| 48  | CAAGCTCGGGTGCAGCCTCTGGTGACCCTCT   |     |                                                |
| 49  | GGAGACTGTGCTCGAACGCATCCAACGAGGC   |     |                                                |
| 50  | GGAGAGGCTGCTTCCGAGCAGAAGAGGATAG   |     |                                                |
| 51  | AAAGAGGAACCTGAAGAAGACCGACAGAGCT   |     |                                                |

SUPPLEMENTARY INFORMATION

|    |                                  |
|----|----------------------------------|
| 52 | CTGCAATAAGCAGGATGAAGCTGTATCACC   |
| 53 | TACTTGTCTGTTGGCCGACGCTTACGCTGCC  |
| 54 | TCCTGAGCACTATAACGAGGAGTTCGCAAGG  |
| 55 | CTGGCGAAGTGGATGAACTGAAATTCGCCTGT |
| 56 | TTGTGGCGACTCTGTGTTTCGAGGTCAAGAA  |
| 57 | TCAGGTCTGAGCCGCTTGTTCACGCCGCT    |
| 58 | GACCAGTTGCCGACTCCAGCAGACCTTAT    |
| 59 | AAATCAAACGAAATCGGCAAAATAGATCAGG  |
| 60 | GCGTGGTGAGAACGAATGGGATACCCAGAAT  |
| 61 | TGATCGCGTCTGGAGTATATGTCTTCACTG   |
| 62 | CCTGTCTGTGTCAGCCATATGCATATTTCTG  |
| 63 | CAGAGGTATGATGTTCCGCTGCGGAGCCGT   |
| 64 | ATGCCAGCAGTACACCTATGAGTAGAACCTG  |
| 65 | TCCTCCACTATGGCGCTACCTCCAAGGAA    |
| 66 | GATTGGCCAAATCCAAGTGCACATCTGTTT   |
| 67 | CGATGAGACTGGTATCAACTCTGCCACCGAA  |
| 68 | GAGTCCGGTCTCCGAGGACCAGGAGAAGT    |
| 69 | TGTGCCATTGAAGTCTTGAGGGTAAACACA   |
| 70 | AGTACAACCTAGCAGACTGGAGGCCGGAG    |
| 71 | TCAGCAAGCAATCTCATCTGCAGCGGTGAGA  |
| 72 | TTCTATGACTGGATGGAGGGTTGGCCAGCA   |

|     |                                           |
|-----|-------------------------------------------|
| 111 | GCCGGACGCTAATATGTCCGATTCTTCTATCACTGCTGCTG |
| 112 | ATTATCTCACATCAAGCAAGATCTACCTCTATCTGTT     |
| 113 | CGGTCCAGCTCTCGACATTATCCATAACATCGGCAACC    |
| 114 | GCCAAACTCGGCCGCTTTCTGAGGTTGTTTAGATCCA     |
| 115 | CAATTCAAGATGCTCAATCGATTATCCCGAGACGAACT    |
| 116 | CTGGGCAGGCTGGAGGAACTGGAGCCACTGCTCGGAG     |
| 117 | ACCCACGAGTCTTTCTTGCCAAGCGCGGTCAACCTT      |
| 118 | AGAACAGAAGGGATGGCGTGGAGCCAGTTCTCCCGAT     |
| 119 | AGCTGGTGAACAAAGCTTACGGAGCTACTCCGATTGA     |
| 120 | GGCTTCTCGACTCCGTCGATCCTGATTTCCCATCACA     |

| Sl. | Sequence                                                                          |
|-----|-----------------------------------------------------------------------------------|
| 121 | CACACCCGCGTTTTTCGCTTAATGCGGGAATCTGTGTTTTGAGGAACTGC                                |
| 122 | AGAAATTTAGTTTTTAGCAGGACCTGAACGCTAAGATTTTTGAGCATCAAC                               |
| 123 | TATCTTTGACATTTTCTCTTGGGTCTCACTGCTGATTTTCCATCCTGGA                                 |
| 124 | AGAGAGACCCTTTTATGGTCTGTGCATTCTGTGATTTTTGACTGTCAA                                  |
| 125 | TGCATCCAGAATTTTTGTTCAGGGTCCGAGACATTTTTGTTCGCGAAA                                  |
| 126 | AAGAATTTGAATTTTTGAACCATAGCTCAAGGTGATTTTTTTGGGCTCGA                                |
| 127 | ACACGCTTGGTTTTAACTCGCCGGAGGACTATCAATTTTTTTCGTCACC                                 |
| 128 | CTGCCACTCGCTTTTTGAGTCTGCTCAAGATCAATATTTTATATGTACAG                                |
| 129 | GCTCTGCCTTCTTTTCTGTACCAGCACCTACTACATTTTACAACAGCAT                                 |
| 130 | GTACCTCTGTTTTTTGCGCAGAGAAGATTGGAGATTTTTAAGATCATCG                                 |
| 131 | GCAGCTGATCTTTTTTGGAAAGTCTGACGCGAACACAATTTTGGAGTGGAA                               |
| 132 | GTGCCGTAAGTTTTTCACTAAATCGGACGGGAAAGTTTTTCCGGCGAAGC                                |
| 133 | TGGCTGGCTTTTTATGGTTCAGGTCGATGATTACTTTTTTCACTACT                                   |
| 134 | CAGACAGATTTTTTCAACAGGGTGAAGGACATCGTCTTTTTAACCAGTGG                                |
| 135 | TGGCCCTGGAGTTTTTATGAAGAAGACGATGACCTGCTTTTTTGGAGATCTT                              |
| 136 | GACGTGGTCAATTTTGCAGCTGAACCTGGAAAGAAGCTTTTAGTTGAGGTT                               |
| 137 | CGAAGCACTATTTTGGGAACTGGAGTTATCCCTATTTTTCTGAAGTAC                                  |
| 138 | CCATTGGCACTTTTTTTCATGGCAAGGGACGTGATCATTTTTGAAGGGCTT                               |
| 139 | ACTATTAAGATTTTTACGTGGACTCGCGATGGCCATTTTTTACGTGAAC                                 |
| 140 | TGTTTGGAGGTTTTTTTCTGATGATCTGACGATTTTTTGGAAAGTGAC                                  |
| 141 | GATTGACGACTTTTTAACTCAAAGACCGTGGGTAATTTTTTCAAAACCAG                                |
| 142 | CAATCAGTCTTTTTTCTGAAGACTGATACCGTGTTTTTTCTATGCAGGA                                 |
| 143 | CCATAAGAAGTTTTTGGCAGGTCTAGAAGATCCCTTTTTGAGATGTTGT                                 |
| 144 | TCAAGAGCTTTTTTCTGCTGATCCAGTATACTAATTTTTTTCATGCACACA                               |
| 145 | CAAGGCTCAGTTTTTAGACTATCAAAACGCACTGGTTTTTATCTTGCAAAGCGGGCGCTATTTTTGGGCGCTGGC       |
| 146 | CCAATATCCAGTTTTTACTCTCAGGCAAGCCGGCTTTTTCTGGAAAGCAAAGTGAAGATTTTTTCTCTCAATT         |
| 147 | AGTTCTGGAGTTTTTGAAGCGCAAAACCGGACGATTTTTGCTCTCAGGGGCCACAGACGTTTTTTATCCGCGA         |
| 148 | ATCGACTATGATTTTTGGACTCCAGTCAAGAAGGACTTTTTAATCGCGTCAGTCAGGGAGGATTTTTCATTGCTACT     |
| 149 | GCCTTCATGGATTTTTCGATCAAGAAATCCCTGATCTTTTAGCTCCCTGCGCTGTTCAAGTTTTTCCGACCAAGC       |
| 150 | AAGACGCACTATTTTTTACTTCTCTCCTCAAGATTTTTTAGCAGAGGCTCGCGAACAGTTTTTTGCGACCATC         |
| 151 | TCCTCTGGCGATTTTTGGTGGCCGATCCAGATTTTTTGGCTTCCATGCACCACAGGTTTTTTTACATCAAT           |
| 152 | GCTGGAGACATTTTTTGGCTACTTCTCGAGTCTGTTTTTAATCAGACTAAAGGAATCTTATTTTTTAAAGCTGCAA      |
| 153 | GCTTCGGCAAGTTTTTACCTTGATCATCCAACAGGAGTTTTGAGGATAAGACAAAGGGCACTTTTTTCCAGAATAAG     |
| 154 | ACTAGGAATCCTTTTTCAACCCATTGAGGTTAATTTTTTTCACAACCACCCTCACCATCCATTTTTACATGAGAAA      |
| 155 | AACCTCCCAATTTTTAGAGGGCTCACGCTGCACCTGTTTTTGTCTCTCAGTGCCGGCTGGTTTTTAGAAGTTTGA       |
| 156 | GCTCACAGGCTTTTTTACTGAGTGGCGTATCAACATTTTTGCAAGACTCCAAGAAGGTCAGTTTTTCTTGTCCAG       |
| 157 | CTGGGACTGTTTTTTCGCTATGACTTATGTCCTCGTTTTTAAATCGTGGCTGTTGGCGCTTTTTTAAAGGAACTGC      |
| 158 | GACTCACCATTTTTTCTATAAAGGCAAACTCGCCGATTTTTACTGGACGAAAAGTGGGTTATTTTTCTCGAACCA       |
| 159 | CCTACCTCAAGTTTTTAAAGCTGTTGAGTCTAAGCAGTTTTTATTACTGCAATCAAGAATAAGTTTTTGTGCCCTGT     |
| 160 | AGATGGTGACTTTTTAGCGAGTCCAAGCTCGTTTTTTTTCACTCCACTCGCTATGAAGATTTTTTGGGCGCTGGGA      |
| 161 | GCTGGATCTGTTTTTCCGCTGTCTACTGCTGTTGTTTTGAGACCTGCTGCTGACCTGATTTTTAAGATCTGAA         |
| 162 | ACATTCGTGTTTTTCCACGAGGTCCTGTTTTTTTTCTGGTGGATGTGACATGGGGTTTTTAGCCAGGCAC            |
| 163 | AGGATCAATGGTTTTTATTCAGTGTGAACCTCGAGGCAATTTTTGGTGGTACCCAGAAATAGCCCGTTTTTAGATAGGGTT |
| 164 | TCCGCTCGAATTTTTGAACCTAACTTTGAGTCTGTTTTTGTCTCAGATTTTCCAAGAAATGTTTTTGGCAATGAAG      |
| 165 | ATCCTGTGCTTTTTTGGCCGAACAGTAAAGATCACTTTTTCCCTGCACCATAGCCAGTACATTTTTTACCTTCCT       |
| 166 | TGAAGCACCGTTTTTATCGCAGAGGAAAGAGGACTTTTTGCTGAAGCGCCTGAACGAAAGCTTTTTTCAAGGCTCTG     |
| 167 | GACAAGAGGTTTTTCAAAGAGGCAATTAATCTTCTATCCATGCGATGGACAGCGCTATTTTTATTCCAATTT          |
| 168 | TATTCTGGAGCTTTTTTGAACCTGAAAGACAGAGAGCTTTTTTGTAAAGCACTCTCCATTGTTTTTAAAGATCAGG      |

**Table S6:** Sequences of the staple strands for SnR without any modification.

| Sl. | Sequence                          | Sl. | Sequence                                        |
|-----|-----------------------------------|-----|-------------------------------------------------|
| 1   | CTATCAGGGCGCCGCTACAG              | 73  | GAGCAGACTGGTCGCGGAGCCCTCAGCCTCA                 |
| 2   | TTGTGGCGCAGTGTGTTC                | 74  | GAGAACGCCTGCCAGCGATGACCAAGCTGA                  |
| 3   | GATTCAATCCATCCTGGGCT              | 75  | GGTGTCAAAGCAGCTAAGTTGGTCTCAATC                  |
| 4   | ATTCCTTCTACCTGGCCGC               | 76  | GCTGGCAATCAGGTCGTCGAGATTACCGAGT                 |
| 5   | GCCAGCAAGCTGAGACTGTG              | 77  | CAGAGCAGAGAAGATTTCTGCACTGAGGA                   |
| 6   | CAGCAAGGATGAAGTCCGAC              | 78  | CCAGTCTATCCTCCACGTCTATTAGGCGGT                  |
| 7   | CCCTCACCATCTCTCGACCA              | 79  | GAGAAGTAGTTTAGCGGAGACTGGCGCCATCT                |
| 8   | AACTGACTTGCCAGACGCTG              | 80  | CAGTCTCACAGTCAACCAATCCATGTCTAAT                 |
| 9   | GACCTACTGGAGAGTTGCC               | 81  | TCTTCTATCTGGATGGAGGGTTGCCGTGATT                 |
| 10  | CCAAGCGCGGTGCTTCCGAG              | 82  | GTCAGCAACGCCAATCTCATCTGCTTCATCG                 |
| 11  | CTGAAGGAGATTTTCGACGCT             | 83  | GAGACGATTTCCCTCGCTTCTACAGGCCGGA                 |
| 12  | ACTGGAGCCAGCCCAAGGCC              | 84  | ATCAAAAGCGAAATCGGCCAAAATCTTTTTGG                |
| 13  | CCGGTATTCTCGTCGAAACC              | 85  | GGTCGAGGTCACCCAAATCAAGTCTTATAA                  |
| 14  | CGCAACTCACCTTGGAGGG               | 86  | ACTGAGAAAAGAGTCTCTCTCAGAGTCAAGAA                |
| 15  | GATTGGAAGGAGATTTCCGC              | 87  | TCAGGTCTGAGCCGCTTGTTCATCAGGTC                   |
| 16  | GTCCGCTTCGGACATGTCTG              | 88  | TCTGAAGGATCTTCCGCCCTCATCGTCAGAG                 |
| 17  | TACGGAGCTATGGCCGACG               | 89  | GTATGCATTTCCGCTGCATTTCCAAGAGTC                  |
| 18  | TTCGGCCAGGGCAAGAAG                | 90  | AAGTGATCCTCACTTGAAGGATTCGAAGGAC                 |
| 19  | GTATTACCGGCATCTGTTTCG             | 91  | CTGATCGACAACATCTGGAGAACAGGCTGG                  |
| 20  | CCTCCACAAGTTACGAAGCC              | 92  | GCCTGGAACAAGTGCACACCACCGCCTTGAC                 |
| 21  | ACCATCCGCGATTTCTCGAC              | 93  | ACAGGCTAACAAAGTGTACCTCAAAGATTGG                 |
| 22  | AATTGATCGACCCAACTT                | 94  | TGCTGATTGCATTCAACAGATCTAGGCTG                   |
| 23  | AGCTGGACCGGGTGGATGAA              | 95  | CCTCCTCTGTATCGAGGCCACGCCACATTG                  |
| 24  | GTAACCACGCAAGTGTAGCGGTACCGATGAC   | 96  | CTGCAAATAAGCAGGATGAAGCTGTATTTCAG                |
| 25  | TGTCACCAACGCAAGAAGCTGGTGCCTGCCG   | 97  | AGAAAGTGGCAGAACCTCAACCAACGCTGCC                 |
| 26  | CAGGGATTTGGCCCTTCTACGAAGGGGAAGA   | 98  | GAAAAACCTGGCGGTGGATCCAACGAAACGT<br>CAAAGGGC     |
| 27  | AAGCGAAAGTGGCGAGAAAAGGAAAGTCCAG   | 99  | GGACGCCGCTAGTTTGGAAACAAGAGTCCACTCTGT<br>GTTTCGA |
| 28  | GAGGAGCATGGCACGACCGCTCACCCCGAT    | 100 | CAGAACAGAGGTGGCAACCTTGAAGATCGCTTCT<br>GAGAAACA  |
| 29  | TTAGAGCTAACCCATAAAGGGAGCGGAAAAGTG | 101 | AATATGTCCGCTTCTGAGGTTGTTTCAAAGATAT<br>CCTGGAT   |
| 30  | GGTTAAGGTGCAGCTGCACCCCTGAGGTGCT   | 102 | CCAAGGAAATCTCAATCGATTATCCCGAGCGACCT<br>ATGAGTA  |
| 31  | CAGTAATCAGATCCTCGTCGTGCGCAGCTG    | 103 | CCTCCAGCATCACACCTGTTGCGTTCAGATGCTTCT<br>CTCTCG  |
| 32  | CAGTTGCCGACTCCAGCAGAAGACTAGCAT    | 104 | CAGCTCCTGGGGAGCGCGACGCATATCTGCCGACT<br>GAGAGGC  |
| 33  | CTTGGCTAGTGAGCAGGAATTTCTCAGGGAC   | 105 | AACTGAACTCCAGCATCGTCACAGAGGTTAGCCT<br>CTCGGCA   |
| 34  | AGACTGAGTGTGCAACGCATCCAACCTGGCG   | 106 | TTCGACTAAGATAACCATCGTGGCCAAGGCTTTGG<br>ATACCT   |
| 35  | TGGTGGTCAATGGGATACCTTCCCTCTGG     | 107 | TCTTTCTTGGCAGAAGACAGAGCTGGAGAGGTGTC<br>TATGAAG  |
| 36  | CTCCAAGAGATGTACTTCAATATCATCTGCC   | 108 | GGTGTCAAGAAAGGAACATCTCCAAGGAAATTGTC<br>GGTCAGAA |
| 37  | GCTGCCTGATGGTGTACGAATACTCTGACCT   | 109 | CTTTGGAGGACACGCTATGTGGTCCAGATTGCGGC<br>TTGTACA  |
| 38  | CCATTGGACTGGAGGGAGGCTCATGGCTGCT   | 110 | AACACAGAGTTGGCTGAACGATCTGGCCCTGAGG<br>ACCCAGGT  |
| 39  | CCAGGCCACAACCTCCGGTGCAAGCAAACAC   | 111 | CGCAGGCATTAGAAGTTGTGCCATTCAAGAATTGA<br>CTACCCA  |
| 40  | CAGAACCTCTGATCACTACGGCCCTGACAC    | 112 | GCTGATCAAGAGCATCATGACAGATATCAAGCGC<br>ACCATGAA  |
| 41  | AATGGGTTTTCACACCCTGCATTGCGACAAC   | 113 | GGAACCTCGCCGAGGAGTGGACCAAGTCTGCCATC<br>ACTGCCCT |
| 42  | GGAGTTGGTCACTGCTGCTGGCCGGCCAAGT   | 114 | TTGCAAAGCTTTTATCACCTACTTGTCCGCATCCA<br>CGAGTC   |
| 43  | TCACCTCTACGAACAAGTCCGCGACGCTCT    | 115 | GGACGGCTTCAAGAACTCCGTCGATCCTGATCAGG<br>CATCACA  |
| 44  | TAAGCTCATGCCGGCGGTAGGTTGAAGATCT   | 116 | ACTGCTGCTGATATTATCCTCACCTCTGTGTTAGAA<br>TTTGT   |
| 45  | ACCTCTGTGGGGCTCATCAAGCGGAAGGCA    | 117 | TCGAACCTGTGCGAGGCTCTTTAGAGATAAGTGGC<br>GCCTACC  |
| 46  | CCTGTTCTGGTCAAGCATATGCATGGCGGCC   | 118 | GGGTGAAGTGATTATCCATAACATCGACGTGTAC<br>CGCCCA    |
| 47  | GCGAACATGAGGCTGCTGGCGAGGAGCCGT    | 119 | ATATGTCCAGCCTGGAGATGATCAACTCCCTGGTC<br>CTGGAGT  |
| 48  | GCAGTATAGACACAGCTGGTGAACCTGGCAC   | 120 | TTGATTAATCCTGAATCGCAAGGCTGGCGAACAGC<br>TGAAGTG  |
| 49  | TGGTAAGAACCCATACGGTCCAGAAATTGGA   |     |                                                 |
| 50  | CACTGATCTGTGGGGCGTGGGTGCCACATCT   |     |                                                 |
| 51  | CTGGAGAAGGGTCTGCTCGCGGTGTGTTCA    |     |                                                 |
| 52  | TGAAGGACACAATAGATGCCTCTGTACCC     |     |                                                 |
| 53  | GATCACTGCCGCGGAGAACACCTGCAGTCTCT  |     |                                                 |
| 54  | GCCAAGCTGAGGTGCAGCCTCTGGCAAATAT   |     |                                                 |
| 55  | AAGATTGTCCAATCTGAGGTGGATGAACGAG   |     |                                                 |
| 56  | AGGAAACTGAAGACAAGGTGAGCAGAGGAGA   |     |                                                 |
| 57  | GAAAGAACGAGGTGGTCAAGATCTCTGGGAA   |     |                                                 |
| 58  | GATCCCAACTGTTCAAGAATAAAGTCTCTGCG  |     |                                                 |
| 59  | CTTGATGGACACTCTGGAGGGCGTTCATTT    |     |                                                 |
| 60  | CAGCTCACCGTTTCCCTTCTCTCGATAGAA    |     |                                                 |
| 61  | AGAGGAAACTGAAGAAGACCGAGATCGATCC   |     |                                                 |
| 62  | TGTACCCTAGATGGATGGCGTGGAAAGAATCT  |     |                                                 |
| 63  | CTGCTGGAACCTGCCAAACTCGAGCCAGTTC   |     |                                                 |
| 64  | GCACTAGGACGAGGATTTTCGCCTTAAAGCTG  |     |                                                 |
| 65  | CTCCAACAGGAAGAACAGAAGACGTTCTCTGA  |     |                                                 |
| 66  | ATTAAGATTTACCGAAGATGTGGTCAAGAA    |     |                                                 |
| 67  | CGATCTGAACGAACTCAAGCAATAGAACGCA   |     |                                                 |
| 68  | CCCGCCCTTTCATGATCAATTGCGCCATCAC   |     |                                                 |
| 69  | AGATCCTGGACCCTTCTCTGTTTCAGAGCAAT  |     |                                                 |
| 70  | GAAGTCTATATCAACTCTGTCTGTTGCGTGA   |     |                                                 |
| 71  | CAACCGGACAGCTGCTGAAGGAGTTCGATGA   |     |                                                 |
| 72  | ACGAGTTCTGCAGAGATGCGCAGCGGCCAAAA  |     |                                                 |

| Sl. | Sequence                                                                      |
|-----|-------------------------------------------------------------------------------|
| 121 | AGGCTCAGGAGTTTTACTATCAAAGCAATCAGTCCTTTTTCTGAAGACT                             |
| 122 | GGTTTACCTCGTTTTTAACCAATCTTCAGATTCAACATTTTTGGGTGGATGA                          |
| 123 | GACCTGCTGGATTTTGTATCTTGGGCCCTCAAGAAGCTTTTTGTGTGCTGG                           |
| 124 | CGAACACAAGATTTTGTATGGAATGCCCTCCCAAAGTTTTAGGGCTCAGT                            |
| 125 | ACCATGGCACTTTTTCTCATGGCAAATTCACAACCTTTTACCCTGCTCAG                            |
| 126 | GCTGGCTCTATTTTTGGTTCAGGTGGATGATTACTCTTTTACATTACTTC                            |
| 127 | CTTCCGCTCGTTTTAAGAACCTAAGTTGACAGCGATTTTGTCCAGTAC                              |
| 128 | TTCAAGGTGATTTTTTGGGGCTCTGGGCACTCCAGATTTTATAAGCAGGA                            |
| 129 | AGAAGGTCAGCTTTTTTGTTCAGCAGGATCAATGGTTTTTATTAGTGTG                             |
| 130 | TGCCGTAAGCTTTTTACTAAATCGGTGACGGGAAATTTTTGCCGGCGAAC                            |
| 131 | TATCCCTATCCTTTTTGAAGTACGTGCTGGATCTGTTTTTCCGCTTGCT                             |
| 132 | GTATCTTGTACTTTTACCTTTGGGCTGAAGCACCCTTTTTCATCGCAGAG                            |
| 133 | TTCTCAAGATTTTTCTTCTGCTGTGCACCTGAGTTTTTCTCTCAGAAA                              |
| 134 | GAAGAAGATTCTTTTCCGAGATGTTCAACGACAAGATTTTATAGCCAAAGA                           |
| 135 | AACACGTCTGTTTTTCAACTCGCCGTGGAGGACTATTTTTCAATTCGTCC                            |
| 136 | GCTGTCCTGTTTTTGCGAGGTGCCGAGATAAGATCTTTTATCGACTATA                             |
| 137 | AGGAAATGTTTTTGGAGGAAGTGAACGCTAAGATTTTGGCATCAAC                                |
| 138 | GGCTGGAGAATTTTTGTGTGACCTGCTGATCTGGAATTTTGTCTGAAGGT                            |
| 139 | GGAGGAGGATTTTTAGAAAGATCCAGACATGGCTATTTTCTCTCAGGG                              |
| 140 | TTCAAGGCGGATTTTCCAGCTGATGCCAGAATTTTCCAGGAGAAC                                 |
| 141 | AAGGACAATCGTTTTCTGCACAACCTAAGGTGCCCTTTTTGTCCAATA                              |
| 142 | GCTGACCTGAATTTTTAGATCTGAACGCTCAAGCAGCTTTTTGAACCAAATC                          |
| 143 | TGAAGATGGGCTTTTTCTGGGAGGCACAGAGCGTTTTTAAAGCACTCG                              |
| 144 | GAGATGAAGAATTTTGACCCTGGAGCGCAGCTCTCATTTTTGGGAGCTGTG                           |
| 145 | GATTACCCTGTTTTTCTATGCAGGATGTCAGGGAGTTTTTACATTGCTACAATTCAGAGCTTTTAGGACCTCAG    |
| 146 | ACATCGTCAACTTTTTAGGTGGCGTCAACACTATTTTTAAAGGCTTCGCCGAAGTGGTTTTACGAATATTT       |
| 147 | AGCACATTACTTTTTGCAATGAAGTTGCTGACCATCTTTTCTGGACCAATCTGGAGGAGAATTTTGCAGCAGGCC   |
| 148 | CTCCTAGCCAGTTTTTACATGACCTAAGAAGAAGGATTTTGTGCTGAAGGCTGAACGAAGTTTTTCCAAAGCTCT   |
| 149 | ACTCGCTGAGTTTTTCTGCTCAAATCAATAATATGTTTTTACAGGTTCTTGTGACATGGGTTTTGAGCCAGGCA    |
| 150 | CTGGGACTGTTTTTTCGCTATGACTTATGTCCTCGTTTTTAAATCGTGGCAATTTGAAGAATTTTCCATAGCATC   |
| 151 | CGAACAGTTGCTTTTTAGACCATCTAATTTGTTGGCGCTTTTTAAGGAAGTCTGACGATTTTTTGGAAAGTGAC    |
| 152 | CTGCCTCCCTTTTTTGTACCAGACTATTAAGAAGCTTTTTGGACTCCAAAGAGAGACCCTTTTATGGTCTTGT     |
| 153 | AACTCGAGGCATTTTTGCGGTACCCAATAGCCCGAGTTTTATAGGGTTGACCTACTACAATTTTTAACAGCATGT   |
| 154 | GGAGCGGGCGTTTTTLAGGGCGCTGCACACCCGCCTTTTTTCGCTAATGCGATGGCCACTTTTTACGTGAACCA    |
| 155 | ACTGCTGTCTTTTTTGTGACCTGCTTTTGGAGGTTTTTTTTCTGATGAATTTCTGTGATGATTTTTCTGTCAAGCT  |
| 156 | AAGATTGACGATTTTTCGAACTCAAACGCCGTGGGTATTTTTATATCAAACCTGCCACCAGACTTTTGTATCCGCG  |
| 157 | GCAAGACCTTGTTTTTATCATCCAGGCTGTTGCGCAGTTTTTAGATTGGTGTGCTCCTCCCTTTTTATTGAAGGAT  |
| 158 | TGTTCAATTACTTTTTTACCTATCATGGACAGCGCTTTTTTAAATCCAATCCATAAGAAGTTTTTGCCAGGTCCT   |
| 159 | CCAGATTGTGGTTTTTCTTCCATGTCCACCAGGTTTTTTTTACATCAATTTGTCGTTTACACTTTTTTCCACTACTG |
| 160 | AATCCAACCCTTTTTATTCATCCAAGGACGTGATTTTTCAAGAAGGGCGGACATCTGTTTTTTGTCCACGA       |
| 161 | CCAATATCCAGTTTTTACTCTACGCAAGCCGGCCTTTTTGGAAGCAACTGGAAGAATTTTTCTCAATTCT        |
| 162 | ACTGGTTATTTTTTGCATCCGAGGCTACTGAGTTTTTGGCTGAAGAAACCAGCAAGATTTTCTCCAATTC        |
| 163 | GTCTCTGAATTTTTTAGACTAAAAGCAATCTATAAGTTTTTCTGCAAATCTCCAACATGAGATTTTAAACCCGATTT |
| 164 | GGAGACATGTTTTTGGCCAAAGCCTTCATGGATCGTTTTTATCAAGAGAGCTGATCAGCTTTTTCTGCAGCAC     |
| 165 | GGAGCTGAAACTTTTTGAAAGCACTAAGCACTCAGGTTTTTGAAGTGGATTGACTATGAGGATTTTTCTCCAGAGC  |
| 166 | GAAGCAGTTGATTTTTGGTCTACATATTGAGTCTGTTTTTGGCTCAGATTTCAAGAAATGGTTTTTCCAATGAAGA  |
| 167 | CCAGATTGTGGTTTTTCTCCATGTCCACCAGGTTTTTTACATCAATTTGTCGTTTACACTTTTTTCCACTACTG    |
| 168 | TGCTTGGCCGATTTTTACAGATCAAGTCACTCCCTGCTTTTTACCAGATTGACTAACATCGACTTTTTACATCTCCG |

Modified Staple Sequences of SnL and SnR

**Table S7:** Sequences of the modified staple strands for SnL of square 1 and 2 for dimer and 1D chain structure. The position “\*X” was modified with the extension of TTGTTGTTGTTGTTG or CAACAACAACAACAA complementary strands.

| Location |       | Original staple sequence at square corner                                            | Modified staple sequence                                    |
|----------|-------|--------------------------------------------------------------------------------------|-------------------------------------------------------------|
| Square   | Comer |                                                                                      |                                                             |
| 1        | 1     | I.CACACCCGCCGTTTTTCGCTTAATGCGGGAATCTGTG<br>TTTTTGAGGAACTGC                           | I.CACACCCGCCGTTTTTCGCTTAATGCGGGA<br>ATCTGTG - *X            |
|          |       | II.CAAGGCTCAGGTTTTTAGACTATCAAAACGCACTGGTT<br>TTTTTATCTTGCAAAGCGGGCGCTATTTTGGGCGCTGGC | II.GAGGAACTGCCAAGGCTCAGGTTTTTAGA<br>CTATCAA                 |
|          |       |                                                                                      | III.AACGCACTGGTTTTTTTATCTTGCAAAGC<br>GGGCGCTATTTTGGGCGCTGGC |
|          | 2     | I.AGAAATTCAGTTTTTAGCAGGACCTGAACGCTAAGAT<br>TTTTGAGCATCAAC                            | I.AGAAATTCAGTTTTTAGCAGGACCTGAAC<br>GCTAAGA - *X             |
|          |       | II.CCAATATCCAGTTTTTACTCTCACGAGCAAGCCGGCT<br>TTTTCTGGAAAGCAAAGTGAAGAAATTTTCTCCTCAATT  | II.GAGCATCAACCAATATCCAGTTTTTACT<br>CTCACG                   |
|          |       |                                                                                      | III.AGCAAGCCGGCTTTTTCTGGAAAGCAAAC<br>TGGAAGAATTTTCTCCTCAATT |
|          | 3     | I.TATCTTTGACATTTTTCTCTGGGTCTCACTGCTGATTT<br>TTCCATCCTGGA                             | I.GCCACCAGACGTTTTTTTATCCGCGATATC<br>TTTGACA - *X            |
|          |       | II.AGTTCTGGAGTTTTTGAGAAGCGCAAACCGGACGCA<br>TTTTTGTCTCAGGGGCCACAGACGTTTTTTATCCGCG     | II.CCTCTTGGGTCTCACTGCTGATTTTTCCAT<br>CCTGGA                 |
|          |       |                                                                                      | III.AGTTCTGGAGTTTTTGAGAAGCGCAAAC<br>CGGACGCAATTTTGTCTCAGGG  |
|          | 4     | I.AGAGAGACCACTTTTTATGGTCTTGTCATTCTGTGATT<br>TTTTGACTGTCAA                            | I.TCAAGAAGGACTTTTTAATCGCGTCAGTCA<br>GGGAGGA - *X            |
|          |       | II.ATCGACTATGATTTTTGGACTCCAGTCAAGAAGGACT<br>TTTTAATCGCGTCACTCAGGGAGGATTTTCATTGCTACT  | II.CATTGCTACTAGAGAGACCACTTTTTATGG<br>TCTTGT                 |
|          |       |                                                                                      | III.GCATTCTGTGATTTTTGACTGTCAAATC<br>GACTATGATTTTGGACTCCAG   |
| 2        | 1     | I.TGCATCCAGAATTTTTTGTCCAGGGTCGGAGACATTT<br>TTTGTGCGCAAA                              | I.AATCCCTGATCTTTTAGCTCCCTGCGCCTG<br>TTCAAG - *X             |
|          |       | II.GCCTTCATGATTTTTTCGATCAAGAAATCCCTGATCT<br>TTTTAGCTCCCTGCGCCTGTTCAAGTTTTTGCCGACCAGC | II.GCCGACCAGCTGCATCCAGAATTTTTTGT<br>TCCAGG                  |
|          |       |                                                                                      | III.GTCGAGACATTTTTTGTGCGCAAAGCC<br>TTCATGGATTTTTTCGATCAAGA  |
|          | 2     | AAGAATTTGAATTTTTGAACCATAGCTCAAGGTGATTTT<br>TTGGGGCTCTGA                              | I.AAGACGCACTATTTTTTACTTCTCTCTCCA<br>AAGATC - *X             |
|          |       | AAGACGCACTATTTTTTACTTCTCTCCAAGATCTTT<br>TTAGCAGAGGCTCGCGAACAGTTTTTTGACAGCACATC       | II.AGCAGAGGCTCGCGAACAGTTTTTTTGA<br>GACCATC                  |
|          |       |                                                                                      | III.AAGAATTTGAATTTTTGAACCATAGCTCA<br>AGGTGATTTTTTGGGGCTCTGA |
|          | 3     | ACACGTCTTGCTTTTAACTCGCCGGAGGACTATCAATTT<br>TTTTCGTCCACC                              | I.CACCACCAGGTTTTTTTACATCAATACAC<br>GTCTTGC - *X             |
|          |       | TCCTCTGGCGATTTTTGGTGCCCGGCATCCAGATTGTTTT<br>TTGGCTTCCATGCACCACCAGGTTTTTTTACATCAAT    | II.AACTCGCCGGAGGACTATCAATTTTTTTCG<br>TCCACC                 |
|          |       |                                                                                      | III.TCCTCTGGCGATTTTTGGTGCCCGGCATC<br>CAGATTGTTTTTGGCTTCCATG |
|          | 4     | CTGCCACTCGCTTTTTGAGTCTGCTCAAGATCAATATTT<br>TTATATGTACAG                              | I.AAGGAATCTTATTTTTAAGCTGCAACTGC<br>CACTCGC - *X             |
|          |       | GCTGGAGACATTTTTTGGCTACTTCTCGAGTCTCTGTT<br>TTAATCAGACTAAAGGAATCTTATTTTTAAGCTGCAA      | II.TGAGTCTGCTCAAGATCAATATTTTTATAT<br>GTACAG                 |
|          |       |                                                                                      | III.GCTGGAGACATTTTTTGGCTACTTCTCG<br>AGTCTCTGTTTTAATCAGACTA  |



**Table S8:** Sequences of the modified staple strands for SnL of square 1-4 for 2D structure. The strands shown in bold are the extension of complementary DNA strands.

| Location |        | Original staple sequence at square corner                                             | Modified staple sequence                                             |
|----------|--------|---------------------------------------------------------------------------------------|----------------------------------------------------------------------|
| Square   | Corner |                                                                                       |                                                                      |
| 1        | 1      | I.CACACCCGCCGTTTTTCGCTTAATGCGGGAATCTGTG<br>TTTTTGAGGAAGTGC                            | I.CACACCCGCCGTTTTTCGCTTAATGCGGGA<br>ATCTGTG - <b>TTAATCCTCGTCAAT</b> |
|          |        | II.CAAGGCTCAGGTTTTTAGACTATCAAAACGCACTGGTT<br>TTTTTATCTTGCAAAGCGGGCGCTATTTTTGGGCGCTGGC | II.GAGGAACTGCCAAGGCTCAGGTTTTTAGA<br>CTATCAA                          |
|          |        |                                                                                       | III.AACGCACTGGTTTTTTTATCTTGCAAAGC<br>GGGCGCTATTTTTGGGCGCTGGC         |
|          | 2      | I.AGAAATTTAGTTTTTAGCAGGACCTGAACGCTAAGAT<br>TTTTGAGCATCAAC                             | I.AGAAATTTAGTTTTTAGCAGGACCTGAAC<br>GCTAAGA - <b>AATTCAGTCCCTTAA</b>  |
|          |        | II.CCAATATCCAGTTTTTACTCTCACGAGCAAGCCGGCT<br>TTTTCTGGAAAGCAAAGTGAAGATTTTTCTCCTCAATT    | II.GAGCATCAACCAATATCCAGTTTTTACT<br>CTCACG                            |
|          |        |                                                                                       | III.AGCAAGCCGGCTTTTTCTGGAAAGCAAAC<br>TGAAGAATTTTTCTCCTCAATT          |
|          | 3      | I.TATCTTTGACATTTTTCTCTGGGTCTCACTGCTGATTT<br>TTCCATCTGGGA                              | I.GCCACCAGACGTTTTTTTATCCGCGATATC<br>TTTGACA - <b>AAAGCTTGTAGAGAA</b> |
|          |        | II.AGTTCTGGAGTTTTTGAAGAAGCGCAAACCCGGACGCA<br>TTTTTCTCAGGGGCCACAGACGTTTTTTTATCCGCG     | II.CCTCTTGGGTCTCACTGCTGATTTTTCCAT<br>CCTGGA                          |
|          |        |                                                                                       | III.AGTTCTGGAGTTTTTGAAGAAGCGCAAAC<br>CGGACGCATTTTTGGTCTCAGGG         |
|          | 4      | I.AGAGAGACCACTTTTTATGGTCTGTGCATTCTGTGATT<br>TTTTGACTGTCAA                             | I.TCAAGAAGGACTTTTTAATCGCGTCAGTCA<br>GGGAGGA - <b>ACAATGATTCAGGTA</b> |
|          |        | II.ATCGACTATGATTTTTGGACTCCAGTCAAGAAGGACT<br>TTTTAATCGCGTCAAGTCAAGGATTTTTCTATTGCTACT   | II.CATTGCTACTAGAGAGACCACTTTTTATGG<br>TCTTGT                          |
|          |        |                                                                                       | III.GCATTCTGTGATTTTTGACTGTCAAATC<br>GACTATGATTTTTGGACTCCAG           |
| 2        | 1      | I.TGCATCCAGAATTTTTTGTCCAGGGTCGGAGACATTT<br>TTTGTGCGCAAA                               | I.AATCCTGATCTTTTTAGTCCCTGCGCCTG<br>TTCAAG - <b>TTAATCCTCGTCAAT</b>   |
|          |        | II.GCCTTCATGGATTTTTTCGATCAAGAAATCCCTGATCT<br>TTTTAGTCCCTGCGCCTGTTCAAGTTTTTGGCCAGCAGC  | II.GCCGACCAGCTGCATCCAGAATTTTTTGT<br>TCCAGG                           |
|          |        |                                                                                       | III.GTCGAGACATTTTTTGTGCGCAAAGCC<br>TTCATGGATTTTTTCGATCAAGA           |
|          | 2      | AAGAATTTGAATTTTTGAACCATAGCTCAAGGTGATTTTT<br>TTGGGGCTCTGA                              | LAAGACGCACTATTTTTTACTTCTCTCTCCA<br>AAGATC - <b>AATTCAGTCCCTTAA</b>   |
|          |        | AAGACGCACTATTTTTTACTTCTCTCTCCAAGATCTTT<br>TTAGCAGAGGCTCGCGAACAGTTTTTTTGCAGACCATC      | II.AGCAGAGGCTCGCGAACAGTTTTTTTGA<br>GACCATC                           |
|          |        |                                                                                       | III.AAGAATTTGAATTTTTGAACCATAGCTCA<br>AGGTGATTTTTTGGGGCTCTGA          |
|          | 3      | ACACGTCTGTCTTTTAACTCGCCGGAGGACTATCAATTT<br>TTTTCGTCCACC                               | I.CACCACCAGGTTTTTTTACATCAATACAC<br>GTCTTGC - <b>AAAGCTTGTAGAGAA</b>  |
|          |        | TCCTCTGGCGATTTTTGGTGCCTGGCATCCAGATTGTTTT<br>TTGGCTTCCATGCACCACCAGTTTTTTTACATCAAT      | II.AACTCGCCGGAGGACTATCAATTTTTTTCG<br>TCCACC                          |
|          |        |                                                                                       | III.TCCTCTGGCGATTTTTGGTGCCTGGCATC<br>CAGATTGTTTTTGGCTCCATG           |
|          | 4      | CTGCCACTCGCTTTTTGAGTCTGCTCAAGATCAATATTT<br>TTATATGTACAG                               | I.AAGGAATCTTATTTTTAAGCTGCAACTGC<br>CACTCGC - <b>ACAATGATTCAGGTA</b>  |
|          |        | GCTGGAGACATTTTTTGGCTACTTCTCGAGTCTCTGTTT<br>TTAATCAGACTAAAGGAATCTTATTTTTAAGCTGCAA      | II.TGAGTCTGCTCAAGATCAATATTTTTATAT<br>GTACAG                          |
|          |        |                                                                                       | III.GCTGGAGACATTTTTTGGCTACTTCTCG<br>AGTCTCTGTTTTTAATCAGACTA          |
| 3        | 1      | I.GCTCTGCCTTCTTTTTCTGTACCAGCACCTACTACATT<br>TTTACAACAGCAT                             | I.CACCTACTACATTTTTACAACAGCATGCTT<br>CGGCAAG - <b>TTAATCCTCGTCAAT</b> |
|          |        | II.GCTTCGGCAAGTTTTTACCTTGATCATCCAACAGGAGT<br>TTTTGAGGATAAGACAAAGGCACTTTTTTCCAGAATAA   | II.ACCTTGATCATCCAACAGGAGTTTTTGGAG<br>GATAAGA                         |
|          |        |                                                                                       | III.CAAAGGGCACTTTTTTCCAGAATAAGGCT<br>CTGCCTCTTTTTCTGTACCAG           |
|          | 2      | I.GTACCCTCTGTTTTTTGCGCAGAGAAGATTGGAGATTT<br>TTTAAGATCATCG                             | I.CTCACCATCCATTTTTACATGAGAAAGTAC<br>CCTCTGT - <b>AATTCAGTCCCTTAA</b> |
|          |        | II.ACTAGGAATCCTTTTTCAACCCATTCGAGGTTAATTTTT<br>TTTACAACCACCCTACCATCCATTTTACATGAGAAA    | II.TGCGCAGAGAAGATTGGAGATTTTTTAAG<br>ATCATCG                          |
|          |        |                                                                                       | III.ACTAGGAATCCTTTTTCAACCCATTCGAG<br>GTTAATTTTTTTCACAACCACC          |
|          | 3      | I.GCAGCTGATCTTTTTTGGAAAGTCTGACGCGAACACAAT<br>TTTTGAGATGGAAT                           | I.CGCTGCACCTGTTTTTAGTCTCTCAGTGCC<br>GGCCTGG - <b>AAAGCTTGTAGAGAA</b> |
|          |        | II.AACCTCCCAATTTTTAGAGGGCTCACGCTGCACCTGT<br>TTTTAGTCTCTCAGTGCCGCGCTGGTTTTTGAAGTTTGA   | II.AGAAGTTGAGCAGCTGATCTTTTTTGA<br>AGTCTGA                            |
|          |        |                                                                                       | III.CGCGAACACAATTTTTGAGATGGAATAAC<br>CCTCCAATTTTTAGAGGGCTCA          |
|          | 4      | I.GTGCCGTAAGTTTTTCACTAAATCGGACGGGAAAGT<br>TTTTCCGGCGAACC                              | I.GCTCACAGGCTTTTTACTGAGTGGCGGTGA<br>TCAACCA - <b>*X</b>              |
|          |        | II.GCTCACAGGCTTTTTTACTGAGTGGCGGTGATCAACCAT<br>TTTTGCAAGACTCCAAGAAGTCAAGTTTTTCTTGTCCAG | II.GCAAGACTCCAAGAAGTCAAGTTTTTCTT<br>GTTCCAG                          |
|          |        |                                                                                       | III.GTGCCGTAAGTTTTTCACTAAATCGGAC<br>GGGAAAGTTTTTCCGGCGAACC           |

SUPPLEMENTARY INFORMATION

|   |   |                                                                                     |                                                                     |
|---|---|-------------------------------------------------------------------------------------|---------------------------------------------------------------------|
| 4 | 1 | I.TGGCTGGCTCTTTTTTATGGTTCAGGTCGATGATTACTT<br>TTTTACATACT                            | I.TGGCTGGCTCTTTTTTATGGTTCAGGTCGAT<br>GATTAC- <b>TTAATCCTCGTCAAT</b> |
|   |   | II.CTGGGACTGTTTTTTTCGCTATGACTTATGTCCTCGTT<br>TTTAAATCGTGGCTTGTGGCGCTTTTTTAAGGAAGTGC | II.TCACATTACTCTGGGACTGTTTTTTTCGC<br>TATGAC                          |
|   |   |                                                                                     | III.TTATGTCTCGTTTTTAAATCGTGGCTTGT<br>TGGCGCTTTTTTAAGGAAGTGC         |
|   | 2 | I.CAGACCAGATTTTTTCAACAGGGTGAGGACATCGTCT<br>TTTTAACAGGTGG                            | I.GACTCACCATATTTTTCTATAAAGGCAAAC<br>TCGCCGA- <b>AATTCAGTCCCTTAA</b> |
|   |   | II.GACTCACCATATTTTTCTATAAAGGCAAACCTGCCGAT<br>TTTTACTGGACGAAAAGTGGGTTATTTTTCTCGAACCA | II.ACTGGACGAAAAGTGGGTTATTTTTCTC<br>GAACCA                           |
|   |   |                                                                                     | III.CAGACCAGATTTTTTCAACAGGGTGAGG<br>ACATCGTCTTTTTAACAGGTGG          |
|   | 3 | I.TGGCCCTGGAGTTTTTATGAAGAAGACGATGACCTGCT<br>TTTTTGAGATCTT                           | I.CGATGACCTGCTTTTTGGAGATCTTCTCA<br>CCTCAAG- <b>AAAGCTTGAGAGAA</b>   |
|   |   | II.CTCACTCAAGTTTTTAAGCTGTTGAGTCTAAGCACT<br>TTTTATTACTGCAATCAAGAATAAGTTTTGTGCCCTGT   | II.AAGCTGTTGAGTCTAAGCACTTTTTATTA<br>CTGCAA                          |
|   |   |                                                                                     | III.TCAAGAATAAGTTTTGTGCCCTGTTGG<br>CCCTGGAGTTTTTATGAAGAAGA          |
|   | 4 | GACGTGGTCAATTTTTGCAGCTGAACCTGGAAGAAGCTT<br>TTTAGTTGAGGTT                            | I.GACGTGGTCAATTTTTGCAGCTGAACCTGG<br>AAGAAGC- <b>ACAATGATTCAGGTA</b> |
|   |   | AGATGGTTGACTTTTTAGCGAGTTCCAAGCTCGTTATTT<br>TTCACCTCACTCGCTATGAAGATTTTTTGGGCCTGGGA   | II.AGTTGAGTTAGATGGTTGACTTTTTAGCG<br>AGTTCC                          |
|   |   |                                                                                     | III.AAGCTCGTTATTTTTCACTCCACTCGCTA<br>TGAAGATTTTTTGGGCCTGGGA         |

**Table S9:** Sequences of the modified staple strands for SnR of square 1 and 2 for dimer and 1D chain structure. The position “\*X” was modified with the extension of TTGTTGTTGTTGTTG or CAACAACAACAACA complementary strands.

| Location |        | Original staple sequence at square corner                                             | Modified staple sequence                                      |
|----------|--------|---------------------------------------------------------------------------------------|---------------------------------------------------------------|
| Square   | Corner |                                                                                       |                                                               |
| 1        | 1      | I.AGGCTCAGGAGTTTTTACTATCAAAGCAATCAGTCCTTT<br>TTTCCTGAAGACT                            | I.AGGCTCAGGAGTTTTTACTATCAAAGCAAT<br>CAGTCCT - *X              |
|          |        | II.GATTACCGTGTTTTTCTATGCAGGATGTCAGGGAGGT<br>TTTTACATTGCTACAATTCAGAGCTTTTTAGGACCTCAG   | II.CCTGAAGACTGATTACCGTGTTTTTCTAT<br>GCAGGA                    |
|          |        |                                                                                       | III.TGTCAGGGAGGTTTTTACATTGCTACAAT<br>TTCAGAGCTTTTTAGGACCTCAG  |
|          | 2      | I.GGTTTACCTCGTTTTTAAACCAATCTTCAGATTCAACATT<br>TTTGGGTGGATGA                           | I.CGCCGAAGCTGGTTTTTACGAATATTTGGTT<br>TACCTCG - *X             |
|          |        | II.ACATCGTCAACTTTTTCAGGTGGGCGTCAACATACTAT<br>TTTTTAAAGGCTTTCGCCGAAGTGGTTTTTACGAATATTT | II.AACCAATCTTCAGATTCAACATTTTTGGGT<br>GGATGA                   |
|          |        |                                                                                       | III.ACATCGTCAACTTTTTCAGGTGGGCGTCA<br>CCATACTATTTTTTAAAGGCTTT  |
|          | 3      | I.GACCTGCTGGATTTTTGATCTTGGGCCCTCAAGAAGCTT<br>TTTTGTTGCTGG                             | I.TGCTGACCATCTTTTTCTGGACCAATCTGG<br>AGGAGAA - *X              |
|          |        | II.AGCACATTACTTTTTGCAATGAAGTTGCTGACCATCT<br>TTTTCTGGACCAATCTGGAG                      | II.GCGCAGCGCCGACCTGCTGGATTTTTGAT<br>CTTGGGC                   |
|          |        |                                                                                       | III.CCTCAAGAAGCTTTTTTGTGTTGCTGGAGC<br>ACATTACTTTTTTGAATGAAGT  |
|          | 4      | I.CGAAACACAAGATTTTTGATGGAATGCCCTCCCAAAGT<br>TTTTAGGGCTCAGT                            | I.AAGAAGAAGGATTTTTGCTGCTGAAGGCT<br>GAACGAAG - *X              |
|          |        | II.CTCTAGCCAGTTTTTACATGACCTAAGAAGAAGGAT<br>TTTTGCTGCTGAAGGCTGAACGAAGTTTTTCCAAAGCTCT   | II.CCAAAGCTCTCGAACACAAGATTTTTGAT<br>GGAATGC                   |
|          |        |                                                                                       | III.CCCTCCCAAAGTTTTTATGGGCTCAGTCTC<br>CTAGCCAGTTTTTACATGACCT  |
| 2        | 1      | I.ACCATTGCCACTTTTTCTCATGGCAAATTCACAACCTT<br>TTTACCCGCTCAG                             | I.TCAATAATATGTTTTTTACAGGTTCTTGTGA<br>CATGGG - *X              |
|          |        | II.ACTCGCTGAGTTTTTCTGCTTCAAATCAATAATATGTT<br>TTTTACAGGTTCTTGACATGGGTTTTTGAGCCAGGCA    | II.GAGCCAGGCAACCATTGCCACTTTTTCTCA<br>TGGCAA                   |
|          |        |                                                                                       | III.ATTTCAACAACCTTTTTACCCGCTCAGACT<br>CGCTGAGTTTTTCTGCTTCAAA  |
|          | 2      | I.GCTGGCTCTATTTTTTGGTTCAGGTGGATGATTACTCTT<br>TTTACATTACTTC                            | I.CTGGGACTGTTTTTTTTCGCTATGACTTATG<br>TCCTCG - *X              |
|          |        | II.CTGGGACTGTTTTTTTTCGCTATGACTTATGCTCTCGTT<br>TTTAAATCGTGGCAATTTG                     | II.AAATCGTGGCAATTTGAAGAATTTTTCCAT<br>AGCATC                   |
|          |        |                                                                                       | III.GCTGGCTCTATTTTTTGGTTCAGGTGGAT<br>GATTACTCTTTTTACATTACTTC  |
|          | 3      | I.CTTCCGCCTCGTTTTTAAAGAACCTAAGTTGACAGCGATT<br>TTTGTCCAGTAC                            | I.CGAAACAGTTGCTTTTTAGACCATCTAATTG<br>TTGGCGC - *X             |
|          |        | II.CGAAACAGTTGCTTTTTAGACCATCTAATTGTTGGCGCT<br>TTTTTAAAGAACTGTTCTGACGATTTTTTTGGAAGTGAC | II.TAAGGAAGTCTGACGATTTTTTTTTGGA<br>AGTGAC                     |
|          |        |                                                                                       | III.CTTCCGCCTCGTTTTTAAAGAACCTAAGTT<br>GACAGCGATTTTTGTTCCAGTAC |
|          | 4      | I.TTCAAGGTGATTTTTTGGGGCTCTGGGCACTCCAGATT<br>TTTATAAGCAGGA                             | I.AGAGAGACCACTTTTTATGGTCTTGTTTCA<br>AGGTGAT - *X              |
|          |        | II.CTGCCTTCCCTTTTTGTACCAGACTATTAAGAAGCGTT<br>TTTTGGACTCCAAAGAGAGACCACTTTTTATGGTCTTGT  | II.TGGGGCTCTGGGCACTCCAGATTTTTATAA<br>GCAGGA                   |
|          |        |                                                                                       | III.CTGCCTTCCCTTTTTGTACCAGACTATTA<br>AAGAAGCTTTTTGGACTCCAA    |
|          |        | III.GTATCTTTGACTTTTTACCTCTTGGGCTGA<br>AGCACCGTTTTTCATCGCAGAG                          |                                                               |

**Table S10:** Sequences of the modified staple strands for SnR of square 1-4 for 2D structure. The strands shown in bold are the extension of complementary DNA strands.

| Location |        | Original staple sequence at square corner                                              | Modified staple sequence                                                     |
|----------|--------|----------------------------------------------------------------------------------------|------------------------------------------------------------------------------|
| Square   | Corner |                                                                                        |                                                                              |
| 1        | 1      | I.AGGCTCAGGAGTTTTTACTATCAAAGCAATCAGTCCTTT<br>TTTCCTGAAGACT                             | I.AGGCTCAGGAGTTTTTACTATCAAAGCAAT<br>CAGTCCT - <b>ATTGACGAGGATTAA</b>         |
|          |        | II.GATTACCGTGTTTTTTCTATGCAGGATGTCAGGGAGGT<br>TTTTACATTGCTACAATTTTCAGAGCTTTTTAGGACCTCAG | II.CCTGAAGACTGATTACCGTGTTTTTTCTAT<br>GCAGGA                                  |
|          |        |                                                                                        | III.TGTCAGGGAGGTTTTTACATTGCTACAAT<br>TTCAGAGCTTTTTAGGACCTCAG                 |
|          | 2      | I.GGTTTACCTCGTTTTTAAACCAATCTTCAGATTCAACATT<br>TTTGGGTGGATGA                            | I.CGCCGAAGTGGTTTTTACGAATATTTGGTT<br>TACCTCG - <b>TACCTGAATCATTGT</b>         |
|          |        | II.ACATCGTCAACTTTTTTCAGGTGGGCGTCACCATACTAT<br>TTTTTAAAGGCTTTCGCCGAAGTGGTTTTACGAATATT   | II.AACCAATCTTCAGATTCAACATTTTTGGGT<br>GGATGA                                  |
|          |        |                                                                                        | III.ACATCGTCAACTTTTTTCAGGTGGGCGTCA<br>CCATACTATTTTTTAAAGGCTTT                |
|          | 3      | I.GACCTGCTGGATTTTGTATCTTGGGCCCTCAAGAAGCTT<br>TTTTGTTGCTGG                              | I.TGCTGACCATCTTTTTCTGGACCAATCTGG<br>AGGAGAA - <b>TTCTCTACAAGCTTT</b>         |
|          |        | II.AGCACATTACTTTTTTGAATGAAGTTGCTGACCATCT<br>TTTTCTGGACCAATCTGGAG                       | II.GCGCAGCGCCGACCTGCTGGATTTTTGAT<br>CTTGGGC                                  |
|          |        |                                                                                        | III.CCTCAAGAAGCTTTTTTGTGTTGCTGGAGC<br>ACATTACTTTTTTGAATGAAGT                 |
|          | 4      | I.CGAACACAAGATTTTTGATGGAATGCCCTCCCAAAGT<br>TTTTAGGGCTCAGT                              | I.AAGAAGAAGGATTTTTGCTGCTGAAGGCT<br>GAACGAAG - <b>TTAAGGGACTGAATT</b>         |
|          |        | II.CTCCTAGCCAGTTTTTACATGACCTAAGAAGAAGGAT<br>TTTTGTGCTGAAGGCTGAACGAAGTTTTTCCAAAGCTCT    | II.CCAAAGCTCTCGAACACAAGATTTTTGAT<br>GGAATGC                                  |
|          |        |                                                                                        | III.CCCTCCCAAAGTTTTTGGGGCTCAGTCTC<br>CTAGCCAGTTTTTACATGACCT                  |
| 2        | 1      | I.ACCATTGCCACTTTTTCTCATGGCAAATTTACAACCTT<br>TTTACCCGCTCAG                              | I.TCAATAATATGTTTTTACAGGTTCTTGTGA<br>CATGGG - <b>ATTGACGAGGATTAA</b>          |
|          |        | II.ACTCGCTGAGTTTTTCTGCTTCAAATCAATAATATGTT<br>TTTTACAGGTTCTTGTGACATGGGTTTTTGAGCCAGGCA   | II.GAGCCAGGCAACCATTGCCACTTTTTCTCA<br>TGGCAA                                  |
|          |        |                                                                                        | III.ATTTACAACCTTTTTACCCGCTCAGACT<br>CGCTGAGTTTTTCTGCTTCAA                    |
|          | 2      | I.GCTGGCTCTATTTTTTGGTTCAGGTGGATGATTACTCTT<br>TTTACATTACTTC                             | I.CTGGGACTGTTTTTTTCGCTATGACTTATGCTCTGTT<br>TCCTCG - <b>TACCTGAATCATTGT</b>   |
|          |        | II.CTGGGACTGTTTTTTTCGCTATGACTTATGCTCTGTT<br>TTTTAAATCGTGGCAATTTG                       | II.AAATCGTGGCAATTTGAAGAATTTTTCCAT<br>AGCATC                                  |
|          |        |                                                                                        | III.GCTGGCTCTATTTTTTGGTTCAGGTGGAT<br>GATTACTTTTTTACATTACTTC                  |
|          | 3      | I.CTTCCGCCTCGTTTTTAAAGAACCTAAGTTGACAGCGATT<br>TTTGTCCAGTAC                             | I.CGAACAGTTGCTTTTTAGACCATCTAATTGTTGGCGCT<br>TTGGCGC - <b>TTCTCTACAAGCTTT</b> |
|          |        | II.CGAACAGTTGCTTTTTAGACCATCTAATTGTTGGCGCT<br>TTTTTAAAGAACTGTTCTGACGATTTTTTTGGAAGTGAC   | II.TAAGGAAGTCTGACGATTTTTTTTGGAA<br>AGTGAC                                    |
|          |        |                                                                                        | III.CTTCCGCCTCGTTTTTAAAGAACCTAAGTT<br>GACAGCGATTTTTGTTCCAGTAC                |
|          | 4      | I.TTCAAGGTGATTTTTTGGGGCTCTGGGCACTCCAGATT<br>TTTATAAGCAGGA                              | I.AGAGAGACCCTTTTTATGGTCTTGTGTTTCA<br>AGGTGAT - <b>TTAAGGGACTGAATT</b>        |
|          |        | II.CTGCCTTCCCTTTTTTGTACCAGACTATTAAGAAGCGTT<br>TTTTGGACTCCAAAGAGAGACCCTTTTTATGGTCTTGT   | II.TGGGGCTCTGGGCACTCCAGATTTTTTATAA<br>GCAGGA                                 |
|          |        |                                                                                        | III.CTGCCTTCCCTTTTTTGTACCAGACTATTA<br>AAGAAGCTTTTTTGGACTCCAA                 |
| 3        | 1      | I.AGAAGGTCAGCTTTTTTGTCCAGCAGGATCAATGGTT<br>TTTATTCAAGTGTG                              | I.AGGATCAATGGTTTTTATTCAAGTGTGAAGT<br>CGAGGCA - <b>ATTGACGAGGATTAA</b>        |
|          |        | II.AACTCGAGGCATTTTTTGCAGTACCAATAGCCCGAGT<br>TTTTATAGGGTTGACCTACTACAACTTTTTAAACAGCATGT  | II.TGCGGTACCAATAGCCCGAGTTTTTATA<br>GGGTTGA                                   |
|          |        |                                                                                        | III.CCTACTACAACCTTTTTAACAGCATGTAGA<br>AGGTCAGCTTTTTTGTCCAGC                  |
|          | 2      | I.TGCCGTAAAGCTTTTTACTAAATCGGTGACGGGGAAAT<br>TTTTGCCGCGAAC                              | I.GATGGCCACTTTTTTACGTGAACCATGCC<br>GTAAAGC - <b>TACCTGAATCATTGT</b>          |
|          |        | II.GGAGCGGGCGCTTTTTAGGGCGCTGCACACCCGCCGT<br>TTTTCGTTAATGCGATGGCCACTTTTTTACGTGAACCA     | II.ACTAAATCGGTGACGGGGAAATTTTTGCC<br>GGCGAAC                                  |
|          |        |                                                                                        | III.GGAGCGGGCGCTTTTTAGGGCGCTGCAC<br>ACCCGCCGTTTTTTCGCTTAATGC                 |
|          | 3      | I.TATCCCTATCCTTTTTGAAGTACGTGCTGGATCTGTTT<br>TTTTCCGCTTGT                               | I.TTTGAGGAGTTTTTTTTCTGATGAATTTCTG<br>TGATGA - <b>TTCTCTACAAGCTTT</b>         |
|          |        | II.ACTGCTGTTGTTTTTGTGACCTGCTTTTGTAGGAGTTTT<br>TTTTCTGATGAATTTCTGTGATGATTTTTCTGTCAAGCT  | II.CTGTCAAGCTTATCCCTATCCTTTTTTGA<br>GTACGT                                   |
|          |        |                                                                                        | III.GCTGATCTGTTTTTTCGCTTGTACTG<br>CTGTTCTGTTTTTGTGACCTGCT                    |
|          | 4      | I.GTATCTTGACTTTTTACCTCTTGGGCTGAAGCACCCTT<br>TTTCATCGCAGAG                              | I.AAGATTGACGATTTTTTGAACCTCAAACGCC<br>GTGGGTA - <b>TTAAGGGACTGAATT</b>        |
|          |        | II.AAGATTGACGATTTTTTGAACCTCAAACGCCCTGGGTAT<br>TTTTATATCAAACCTGCCACCAGACTTTTTGTTATCCGCG | II.ATATCAAACCTGCCACCAGACTTTTTGTTA<br>TCCGCG                                  |
|          |        |                                                                                        | III.GTATCTTGACTTTTTACCTCTTGGGCTGA<br>AGCACCCTTTTTTATCGCAGAG                  |

SUPPLEMENTARY INFORMATION

|   |   |                                                                                       |                                                                      |
|---|---|---------------------------------------------------------------------------------------|----------------------------------------------------------------------|
| 4 | 1 | I.TTCCTCAAGAGTTTTTCTCCTGCTGTGCACCTGAGTTT<br>TTTCTCTCAGAAA                             | I.CTGTTGCGCAGTTTTTAGATTTGGTGCTGCT<br>CCTCCC - <b>ATTGACGAGGATTAA</b> |
|   |   | II.GCAAGACCTTGTTTTATCATCCAGGCTGTTGCGCAGT<br>TTTTAGATTTGGTGCTGCTCCTCCCTTTTATTGAAGGAT   | II.ATTGAAGGATTTCTCAAGAGTTTTTCTTC<br>CTGCTG                           |
|   |   |                                                                                       | III.TGCACCTGAGTTTTTCTCTCAGAAAGCA<br>AGACCTTGTTTTATCATCCAGG           |
|   | 2 | I.GAAGAAGATTCTTTTTCCGAGATGTTCAACGACAAGAT<br>TTTTAGCGCAAAGA                            | I.CAACGACAAGATTTTTAGCGCAAAGATGTT<br>CAATTAC - <b>TACCTGAATCATTGT</b> |
|   |   | II.TGTTCAATTACTTTTTTACCTATCATGGACAGCGCTT<br>TTTTAATCCAATCCATAAGAAGTTTTTGCCAGGTCCT     | II.TTCACCTATCATGGACAGCGCTTTTTTAAT<br>TCCAAT                          |
|   |   |                                                                                       | III.CCATAAGAAGTTTTTGGCCAGGTCCTGAA<br>GAAGATTCTTTTTCCGAGATGTT         |
|   | 3 | I.AACACGTCTTGTTTTCAACTCGCCGTGGAGGACTATTT<br>TTTCAATTCGTCC                             | I.AACACGTCTTGTTTTCAACTCGCCGTGGA<br>GGACTAT - <b>TTCTCTACAAGCTTT</b>  |
|   |   | II.CCAGATTGTGGTTTTTCTTCCATGTCCCACCAGGTTTTT<br>TTTACATCAATTGTCGTTTACACTTTTTTCCACTCACTG | II.CAATTCGTCCGCTCTGTCTTTTTTTCCCTG<br>GTGGA                           |
|   |   |                                                                                       | III.AAGACGCACTATTTTTTACTTCTCTCTCC<br>AAAGATCTTTTTAGCAGAGGCT          |
|   | 4 | I.GCTGTCCTCTGTTTTGCGAGGTGCCGAGATAAGATCTT<br>TTTATCGACTATA                             | I.GGACATTCTGTTTTTGTTCACAGAGCTGT<br>CCTCTG - <b>TTAAGGGACTGAATT</b>   |
|   |   | II.AATCCAACCTTTTTATTTCATTCCAAGGACGTGATT<br>TTTTCAAGAAGGGCGGACATTCTGTTTTTTGTTCCACGA    | II.GCGAGGTGCCGAGATAAGATCTTTTTATC<br>GACTATA                          |
|   |   |                                                                                       | III.AATCCAACCTTTTTATTTCATTCCAAG<br>GACGTGATTTTTCAAGAAGGGC            |
